# Supplementary material for: Response of coastal California hydroclimate to the Paleocene–Eocene Thermal Maximum
Source: Copernicus journal article supplement (doi:10.5194/cp-20-1615-2024), 2024-07-25
Supplement: Supplementary file 2 [file cp-20-1615-2024-supplement.pdf]

Supplement of *Clim. Past*, 20, 1615–1626, 2024  
<https://doi.org/10.5194/cp-20-1615-2024-supplement>  
© Author(s) 2024. CC BY 4.0 License.

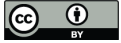

*Supplement of*

## **Response of coastal California hydroclimate to the Paleocene–Eocene Thermal Maximum**

**Xiaodong Zhang et al.**

*Correspondence to:* Xiaodong Zhang (xzhan335@ucsc.edu)

The copyright of individual parts of the supplement might differ from the article licence.

## Supplement

### **Grain size analyses**

Grain particle size was measured using laser diffraction (i.e., light scattering). The system at UCSC is a Beckman Coulter with Polarization Intensity Differential Scatter (PIDS) which better resolves submicron clay particles. This instrument measures particle size distribution in volume, number and surface area with size ranging from 17 nm to 2000  $\mu\text{m}$ . Sample preparation followed the protocols in Blott et al., (2004) using 2 to 5 mg bulk sediments that were dried and sieved (through 2-mm sieve). Each sample was treated with sodium hexametaphosphate (Calgon) prior to the measurement for better dispersion and ultrasonication about 30s to ensure reproducibility.

Grain size can provide insight into sediment transport dynamics, energy conditions within the fluvial system associated with river discharge intensity (e.g., Dade and Friend, 1998).

Specifically, grain size distribution can potentially be used to qualitatively assess relative variations in sediment transport (i.e. fluvial activity) and thus hydroclimate during the PETM to the extent influences of local sea level change can be constrained. Globally, a gradual rise in sea level has been documented in multiple locations (Sluijs et al., 2008) which in theory would tend to favor a shift toward lower grain size. The Lodo grain size record, however, shows several abrupt shifts/anomalies that appear to be unrelated to sea level. The bimodal skewed grain size distribution of Lodo Formation is unusual and might reflect on enhanced physical erosion during the PETM onset (Fig S1). Decreased mean grain size ( $d_{50}$ ) (i.e., silt to clay) is consistent with higher stream flow velocity and the resuspension of finer clay size particles (see Singer 1984; Van Rijn 2007).

### **Leaf wax *n*-alkane extraction and separation**

Total lipid extracts were concentrated under a stream of purified nitrogen using a Zymark Turbovap II evaporator, transferred to 4 ml vials, and further evaporated under a gentle stream of  $\text{N}_2$  gas. Extracts were then separated by column chromatography using 1g deactivated silica gel (70-230 mesh) in an ashed Pasteur pipette, and eluted with 2 ml hexane, 4 ml DCM and 4 ml of MeOH to obtain the aliphatic, aromatic, and polar hydrocarbons, respectively. Samples were

processed with a fused silica, DB-1 phase column (60 m × 0.25 mm I.D., 0.25 μm film thickness) with helium as the carrier at a flow of 2ml/min. GC oven temperature program was 60-320°C @ 10°C/min and isothermal for 30 min. *N*-alkanes were identified through comparison of elution times with known *n*-alkane standards.

Biomarker identification and abundance were determined using a Thermo Trace 2000 gas chromatograph (GC) fitted with a split/splitless injector (splitless mode, 300°C). Isotope analyses were performed using a Thermo Trace 2000 GC coupled to a Finnigan MAT 253 isotope ratio mass spectrometer interfaced with a GC-C III combustion system or a High Temperature Conversion system for δ<sup>13</sup>C and δ<sup>2</sup>H analyses, respectively. The H3+ factor was determined daily prior to standard calibration and sample analysis for δ<sup>2</sup>H measurements. GC column, carrier flow, and ramp conditions were identical to above.

### **Extreme Value Analysis**

To investigate changes in the frequency of heavy precipitation events (i.e., thick exceedance tail) in the modeling output, an extreme value analysis (Coles et al., 2001) was utilized to identify extreme deviations from the median of probability distributions in precipitation. We use the CAM5 simulations to test whether substantial changes in the frequency of extreme events locally occur from pre-PETM to PETM. In order to estimate the extreme value index but not rely on fitting certain distribution (i.e., normal, log-normal), we search for consistent behavior based on the central limit theorem. Peaks over threshold (POT) method were used to focus on exceedance over certain thresholds for extreme value distribution fit. To find the consistent behavior of exceedance distribution, Generalized Pareto Distribution (GPD) can represent any kind of exceedance distribution (i.e., exponential, normal etc.). If we have the threshold  $u$ , the excess distribution over the threshold  $u$  has the distribution function:

$$F_u(y) = P(X \leq u + y | X > u) = \frac{F_X(u+y) - F_X(u)}{1 - F_X(u)}$$

where  $y \geq 0$ ; Then if  $u \rightarrow \infty$ , no matter the underlying distribution of  $X$ , this distribution function (cdf)  $F_u(y)$  will converge to a Generalized Pareto distribution  $GPD(x)$ :

$$GPD(x) = \begin{cases} 1 - \left(1 + \xi \frac{(x-\mu)}{\sigma}\right)^{-\frac{1}{\xi}} & \xi \neq 0 \\ 1 - \exp\left(-\frac{(x-\mu)}{\sigma}\right) & \xi = 0 \end{cases}$$

$\xi$  is the extreme value index.  $\mu$  is a location parameter,  $\sigma$  is a scale parameter.

If  $\xi < 0$ , there is an upper bound.

If  $\xi = 0$ , the distribution is an exponential distribution, with no upper bound.

If  $\xi > 0$ , the distribution is Pareto distribution (Type IV), with a thicker tail.

### **Leaf wax proxy model**

To investigate how seasonal precipitation  $\delta^2H_{\text{precip}}$  effects the vegetation leaf wax hydrogen isotope fractionation during the PETM, we use a leaf wax proxy model to compute leaf water  $\delta^2H$  variations from pre-PETM to PETM. The model calculates the leaf water  $\delta^2H$  composition ( $\delta^2H_{\text{leaf water}}$ ) based on a summation of monthly precipitation  $\delta^2H_{\text{precip}}$  estimates weighted by the monthly proportion within the growing season ( $w_{\text{GS}}$ ) and the precipitation amount fraction of the total precipitation over the growing season ( $w_{\text{PA}}$ ):

$$\delta^2H_{\text{monthly precipitation}} = \sum(\delta^2H_{\text{monthly precipitation}} w_{\text{GS}} w_{\text{PA}})$$

The model assumes negligible fractionation between the soil water and leaf water pools. For input of precipitation  $\delta^2H$  in the model we use water-isotope enabled iCESM1.2 model to compute leaf water  $\delta^2H$  in the context of simulated seasonal precipitation and prescribed changes in growing season length (for pre-PETM and PETM). The model-simulated  $\delta^2H$  leaf water value is the precipitation amount weighted annual  $\delta^2H$  precipitation value as it is sampled by plants in the growing season (Fig S2).

The hydrogen isotope composition of leaf waxes reflects the  $\delta^2H$  composition of precipitation during the growing season (Sachse et al., 2012). Climate conditions (temperature, precipitation) across the PETM may have lengthened the growing season and therefore the  $\delta^2H$  composition of the soil water pool sampled by plants to synthesize their leaf waxes. To simulate the cross interaction of changes in growing season length and the precipitation seasonality, the model

accounts for a variable growing season length by weighting the  $\delta^2\text{H}$  of monthly precipitation by the proportion of that month included in the growing season. Here, we centered the growing season in December, the month of highest simulated precipitation amount (Fig 4b, 4c). Changes in growing season length were made symmetrically; for example, an addition of 30 days to the growing season length is implemented as 15 additional days of spring growth and 15 additional days of fall growth.

Because vegetation type is unconstrained for the Lodo Section across the Paleocene-Eocene boundary (see main text), we cannot directly compare leaf wax model output for the pre-PETM and PETM scenarios and the leaf wax  $\delta^2\text{H}$  data. Instead, we compare the difference between model-estimated leaf water  $\delta^2\text{H}$  differences with proxy leaf wax  $\delta^2\text{H}$  differences from pre-PETM to PETM. Since no significant change in local vegetation type across the PETM is indicated by the average chain length of *n*-alkanes in our study interval (Fig S3) (ACL calculation followed by Tipple et al., 2011 equation (1)), there was probably little change in the apparent fractionation ( $\epsilon_p$ ) between precipitation and leaf waxes across the PETM. As such the leaf wax  $\delta^2\text{H}$  change observed in the Lodo section is likely proportional to the change in leaf water  $\delta^2\text{H}$  composition.

The water-isotope enabled iCESM1.2 model output-driven leaf wax model estimates a PETM (-59.14‰) – prePETM (-63.34‰) leaf water  $\delta^2\text{H}$  difference of 4.2‰ assuming a 365-day growing season. Arbitrarily shortening the growing season to 90 days (centered on December) in the pre-PETM (-65.9‰) and lengthening it to 365 days in the PETM yields a leaf water  $\delta^2\text{H}$  difference of 6.7‰. This result suggests any potential change in growing season length across the PETM had little influence on the leaf wax  $\delta^2\text{H}$  signal since the change in growing season length of 275 days only changed the simulated PETM – pre-PETM difference by 2.5‰. We also examined the other sites for comparison of the predicted leaf water  $\Delta\delta^2\text{H}$  with proxy leaf wax  $\Delta\delta^2\text{H}$  from pre-PETM to PETM with same assumption of no significant change in local vegetation during the PETM. The proxy difference calculation of  $\delta^2\text{H}_{n\text{-alkane}}$  is based on average  $\delta^2\text{H}_{n\text{-C}29}$  of pre-PETM and PETM values respectively. Low sampling resolution and model uncertainties may bias the results. Nonetheless, another mid-latitude site (i.e., Forada paleolat~40°N) and a subtropical site (i.e., Tanzania paleolat~18°S) exhibit little change as does the Arctic Lomonosov ridge site (paleolat~82.95°N). As models show increasing precipitation in the high latitude/tropical area during the PETM, local vegetation regime (variable  $\epsilon_p$ ) may change in the growth season

compared to pre-PETM a factor not included in the proxy model. All sites have limited stratigraphic constraints of the CIE/PETM, cautions need to be taken when comparing the differences between each sites.

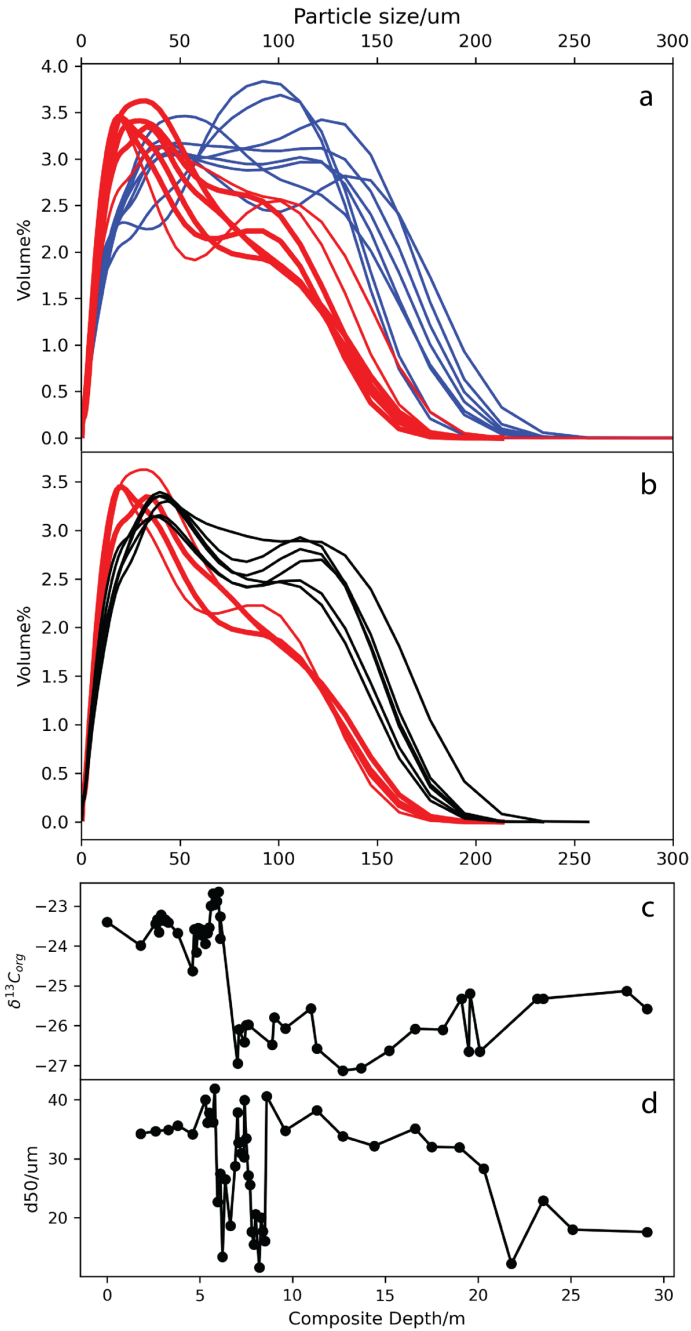

Fig. S1. Grain size distribution in pre-CIE (blue)(a), CIE-onset(red)(a,b) and CIE/PETM main body(black)(b). Large particle size(silt) in pre-PETM with Gaussian distribution(a) with more left skewed distribution across CIE-onset to stable bimodal distribution(b) in the PETM main body. (d)Mean particle size (d50: 50% of the total particle size in sediments) corresponds to CIE onset change in  $\delta^{13}\text{C}_{\text{org}}$  (c) showing an increase in the relative flux of finer grain sizes during the PETM.

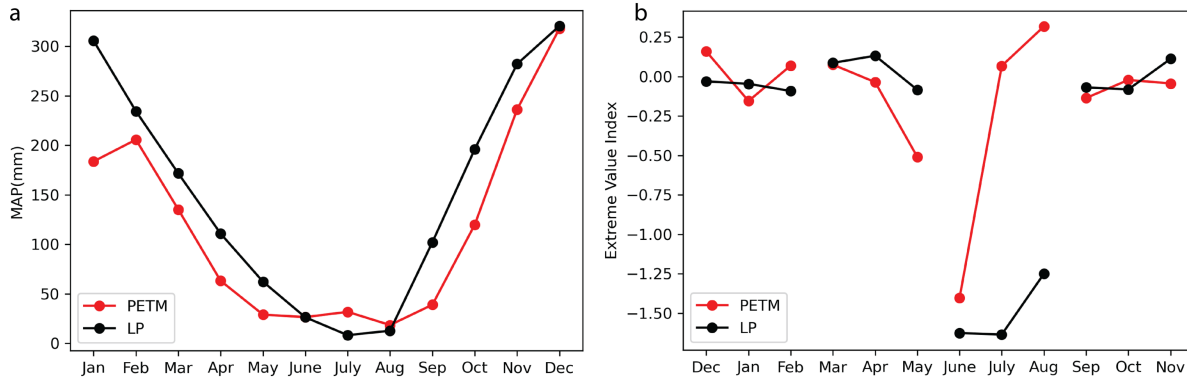

Fig. S2. (a) High resolution CAM5 model output of mean monthly precipitation over 15 model years in central coastal California regions during pre-PETM (Late Paleocene/LP) under low  $p\text{CO}_2$  (680 ppmv) and PETM under high  $p\text{CO}_2$  (1590ppmv). (b) Extreme value index ( $\xi$ ) comparison of mean monthly precipitation in all seasons (winter: DJF, spring: MAM, summer: JJA, fall: SON) of central coastal California region.

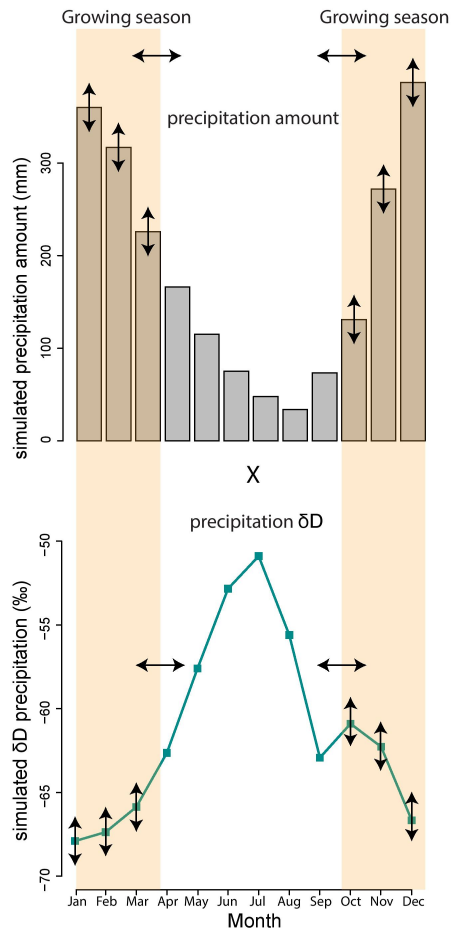

Fig. S3. The leaf wax proxy model results for the Lodo Site. The model calculates the interactive effects of precipitation amount (grey bars),  $\delta^2\text{H}$  of precipitation (blue squares), and growing season length (orange shading). Arrows show variables that can be manipulated (precipitation amount,  $\delta\text{D}$  precipitation, growing season length) to modify the modeled leaf water  $\delta^2\text{H}$  value.



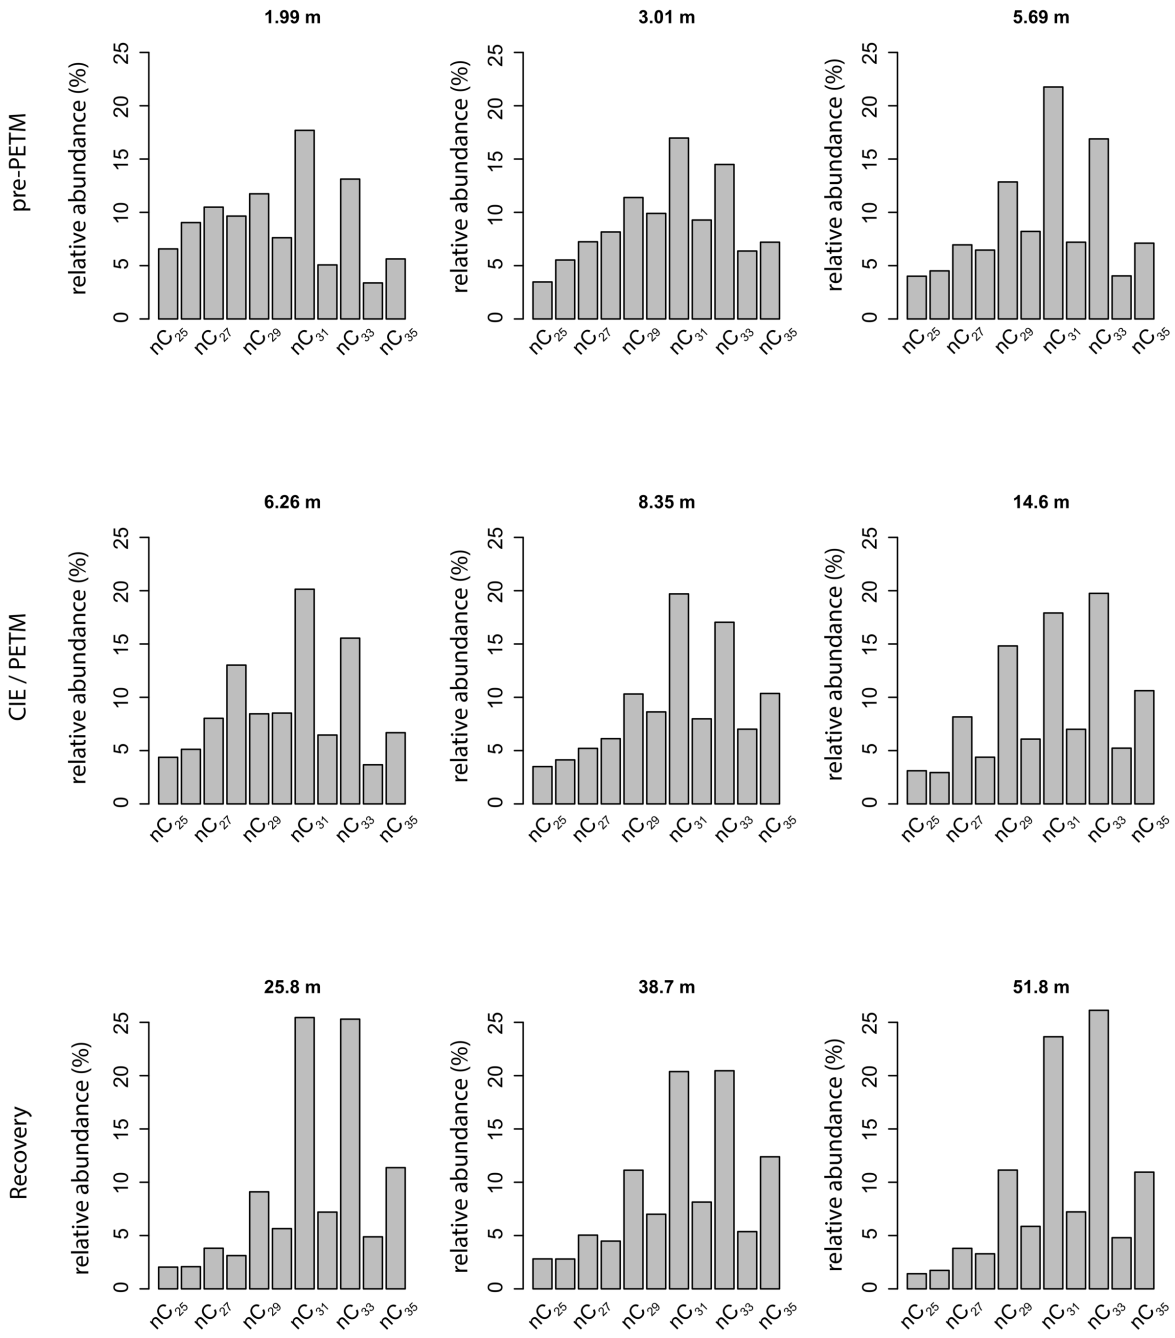

Fig. S4. Histograms show the distribution of long-chain *n*-alkanes of representative samples from pre-PETM, CIE/PETM, and Post-PETM(Recovery) in Lodo site.

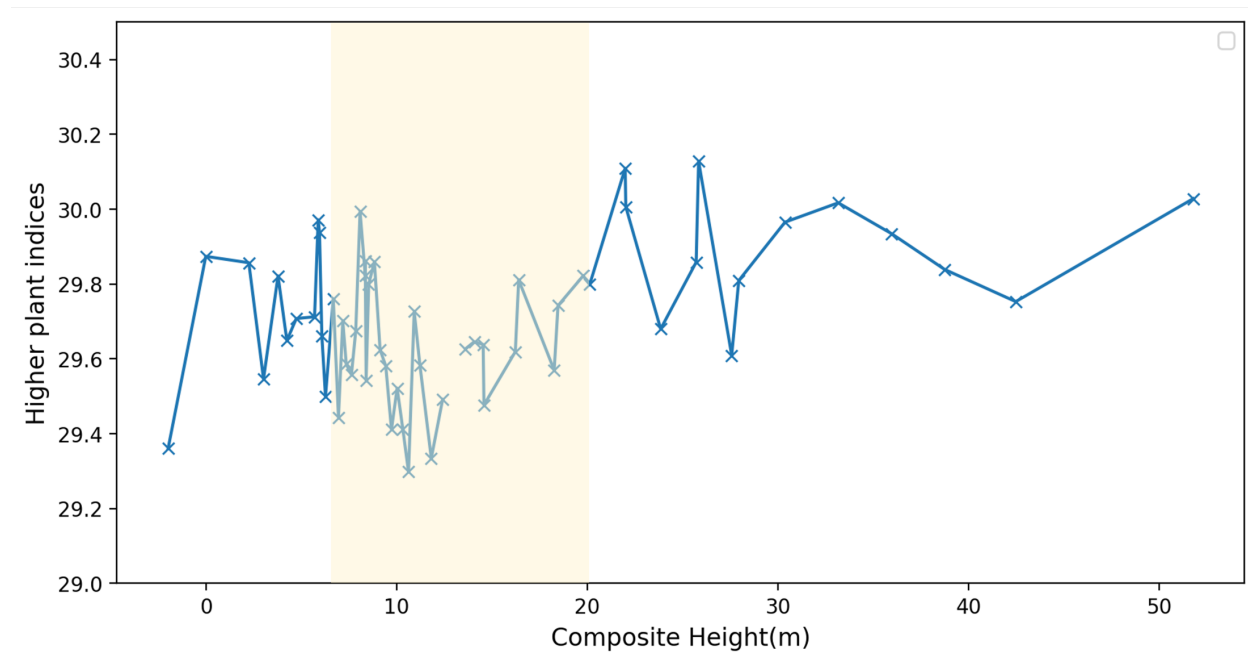

Fig. S5. Higher plant average chain length (ACL) of leaf waxes recovered from the Lodo Formation. Values fall within a narrow range with no clear trends across the CIE onset (light yellow shade).

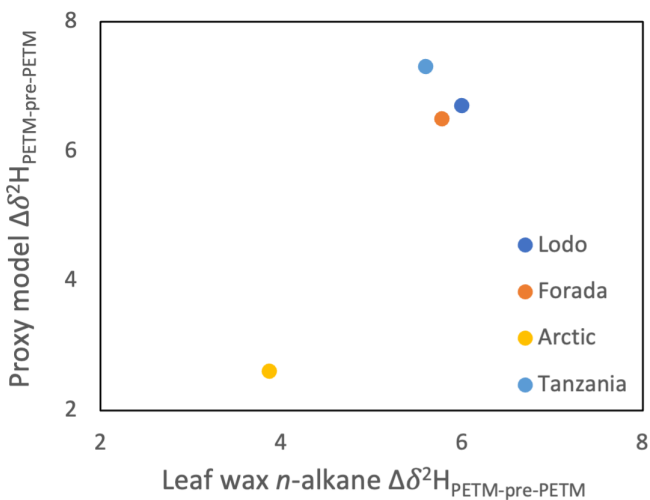

Fig. S6. Comparison of  $\Delta\delta^2\text{H}(\text{‰})$  between predicted leaf water and leaf wax *n*-alkane ( $\text{C}_{29}$ ) from pre-PETM to PETM for several sites spanning tropical to polar latitudes (Forada paleolat $\sim 40^\circ\text{N}$ , Lodo paleolat $\sim 42^\circ\text{N}$ , Lomonosov Arctic paleolat $\sim 82.95^\circ\text{N}$ , Tanzania paleolat $\sim 18^\circ\text{S}$ ). The predicted values were computed using i-CESM output and the leaf wax proxy model described above.

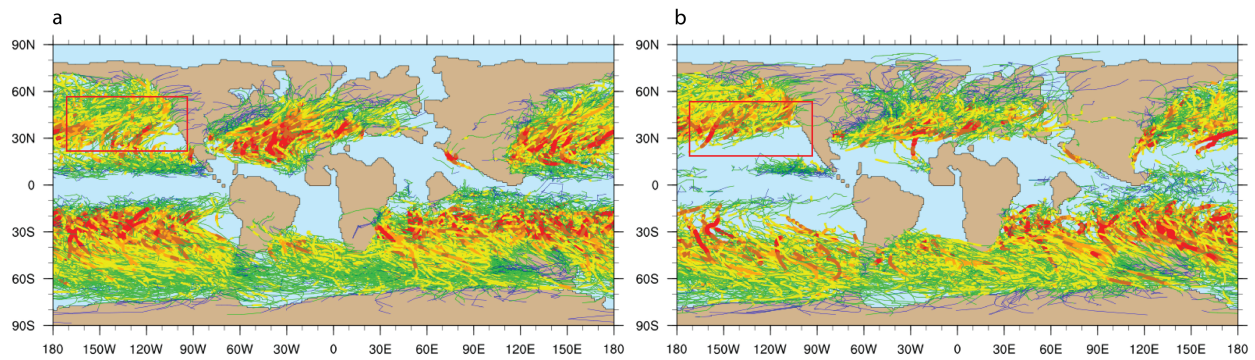

Fig. S7. Tropical cyclone tracks for (a) pre-PETM (b) PETM, model simulations. Color coding follows the Saffir-Simpson intensity scale and is as follows: Blue- tropical depressions, Green- Tropical storm, Yellow – Category 1, Orange – Category 3, and Red Category 4–5. Red square denote study regions. (Modified from Kiehl et al 2021)

Data Table S1. Clay assemblage data of the Lodo Gulch section, central California.

| Composite Height(m) | Kaolinite% | Smectite%  | Chlorite%  | Illite%    | K/S        | I/S        | C/S        |
|---------------------|------------|------------|------------|------------|------------|------------|------------|
| 1.8                 | 0          | 49.3670886 | 0          | 30.3797468 | 0          | 0.61538462 | 0          |
| 3.8                 | 0          | 0          | 0          | 0          | 0          | 0          | 0          |
| 3.92                | 13.19      | 39.516129  | 18.2622269 | 29.0322581 | 0.33378776 | 0.73469388 | 0.46214615 |
| 4.2                 | 0          | 0          | 0          | 0          | 0          | 0          | 0          |
| 4.49                | 14.949495  | 44.5454546 | 18.6868687 | 21.8181818 | 0.33560091 | 0.48979592 | 0.41950113 |
| 4.84                | 15.0442478 | 50.4424779 | 15.0442478 | 19.4690266 | 0.29824561 | 0.38596491 | 0.29824561 |
| 5.04                | 12.75      | 61.589404  | 16.3907285 | 9.27152318 | 0.20701613 | 0.15053763 | 0.26612903 |
| 5.35                | 4.89596083 | 47.2868217 | 10.6079151 | 37.2093023 | 0.10353753 | 0.78688525 | 0.22433132 |
| 5.87                | 4.34362934 | 75         | 11.7277992 | 8.92857143 | 0.05791506 | 0.11904762 | 0.15637066 |
| 6.1                 | 16.2721088 | 55.4285714 | 10.0136054 | 18.2857143 | 0.29356897 | 0.32989691 | 0.18065783 |
| 6.16                | 4.3064877  | 78.5234899 | 5.08948546 | 12.0805369 | 0.05484331 | 0.15384615 | 0.06481482 |
| 6.44                | 7.38177624 | 60.7843137 | 8.30449827 | 23.5294118 | 0.12144213 | 0.38709677 | 0.13662239 |
| 6.61                | 2.39520958 | 66.4670659 | 7.18562874 | 23.9520958 | 0.03603604 | 0.36036036 | 0.10810811 |
| 6.8                 | 5.98113642 | 71.9806763 | 6.57925006 | 15.4589372 | 0.08309364 | 0.2147651  | 0.091403   |
| 7.02                | 8.63585479 | 63.3136095 | 12.6659204 | 15.3846154 | 0.13639808 | 0.24299065 | 0.20005052 |
| 7.22                | 6.4484127  | 52.3809524 | 9.42460318 | 31.7460318 | 0.12310606 | 0.60606061 | 0.17992424 |
| 7.4                 | 8.64       | 32.3809524 | 22.7857143 | 36.1904762 | 0.26682353 | 1.11764706 | 0.70367647 |
| 7.6                 | 0          | 25.8215962 | 23.4741784 | 50.7042254 | 0          | 1.96363636 | 0.90909091 |
| 7.8                 | 0          | 100        | 0          | 0          | 0          | 0          | 0          |
| 8                   | 5.94650206 | 72.7777778 | 3.49794239 | 17.7777778 | 0.08170766 | 0.24427481 | 0.04806333 |
| 8.3                 | 16.55      | 83.4532374 | 0          | 0          | 0.19831466 | 0          | 0          |
| 8.4                 | 0          | 96.2264151 | 0          | 0          | 0          | 0          | 0          |
| 8.6                 | 4.11       | 28.9017341 | 21.9044722 | 45.0867052 | 0.142206   | 1.56       | 0.75789474 |
| 8.8                 | 9.43       | 68.159204  | 10.4739461 | 11.9402985 | 0.13835256 | 0.17518248 | 0.15366884 |
| 9                   | 3.57       | 22.7642276 | 20.0049273 | 53.6585366 | 0.156825   | 2.35714286 | 0.87878788 |
| 9.4                 | 24.26      | 67.8688525 | 0          | 7.86885246 | 0.35745411 | 0.11594203 | 0          |
| 9.6                 | 11.06      | 20.610687  | 11.8452224 | 56.4885496 | 0.53661482 | 2.74074074 | 0.57471264 |
| 11.3                | 13.76      | 40.7407407 | 10.3174603 | 35.1851852 | 0.33774546 | 0.86363636 | 0.25324675 |
| 12.1                | 24.05      | 75.9493671 | 0          | 0          | 0.31665833 | 0          | 0          |
| 14.4                | 19.48      | 33.8129496 | 12.1748755 | 34.5323741 | 0.57611064 | 1.0212766  | 0.36006547 |
| 16.6                | 12.02      | 27.3381295 | 16.032888  | 44.6043166 | 0.43967895 | 1.63157895 | 0.58646617 |
| 19                  | 16.82      | 14.6417446 | 14.953271  | 53.5825545 | 1.14877021 | 3.65957447 | 1.0212766  |
| 20.1                | 35.29      | 22.3529412 | 0          | 42.3529412 | 1.57876316 | 1.89473684 | 0          |
| 21.8                | 24.8       | 63.0081301 | 0          | 12.195122  | 0.3936     | 0.19354839 | 0          |

|      |       |            |   |            |            |            |   |
|------|-------|------------|---|------------|------------|------------|---|
| 22   | 19.42 | 64.8293963 | 0 | 15.7480315 | 0.29955547 | 0.24291498 | 0 |
| 23.5 | 30.73 | 27.9596977 | 0 | 41.3098237 | 1.09908198 | 1.47747748 | 0 |
| 25.1 | 10.68 | 18.1008902 | 0 | 71.2166172 | 0.59002623 | 3.93442623 | 0 |
| 29.1 | 24.35 | 51.3043478 | 0 | 24.3478261 | 0.47461864 | 0.47457627 | 0 |

Table S2. Carbon isotope data of bulk organic sediments for the Lodo Gulch section with published data from John et al., (2008) used in Figure 3.

| John et al., 2008   |                                    | This Study          |                                    |
|---------------------|------------------------------------|---------------------|------------------------------------|
| Composite Height(m) | $\delta^{13}\text{C}_{\text{Org}}$ | Composite Height(m) | $\delta^{13}\text{C}_{\text{Org}}$ |
| 44.46               | -24.81                             | 6.1                 | -23.82                             |
| 40.74               | -26.41                             | 6                   | -22.64                             |
| 37.36               | -24.18                             | 5.9                 | -22.87                             |
| 32.5                | -25.11                             | 5.8                 | -22.96                             |
| 30.89               | -25.75                             | 5.7                 | -22.68                             |
| 29.1                | -25.58                             | 5.6                 | -22.99                             |
| 28                  | -25.13                             | 5.5                 | -23.54                             |
| 23.5                | -25.32                             | 5.4                 | -23.68                             |
| 23.2                | -25.32                             | 5.3                 | -23.94                             |
| 20.1                | -26.65                             | 5.2                 | -23.6                              |
| 19.57               | -25.19                             | 5.1                 | -23.73                             |
| 19.1                | -25.33                             | 5                   | -23.57                             |
| 18.1                | -26.1                              | 4.9                 | -23.55                             |
| 16.6                | -26.08                             | 4.8                 | -24.16                             |
| 15.2                | -26.63                             | 4.7                 | -23.58                             |
| 13.7                | -27.07                             | 4.6                 | -24.63                             |
| 12.7                | -27.13                             | 3.8                 | -23.68                             |
| 11.3                | -26.57                             | 3.3                 | -23.41                             |
| 10.99               | -25.57                             | 3.2                 | -23.38                             |
| 9.6                 | -26.07                             | 3.1                 | -23.33                             |
| 9                   | -25.79                             | 3                   | -23.36                             |
| 8.9                 | -26.48                             | 2.9                 | -23.22                             |
| 7.6                 | -25.98                             | 2.8                 | -23.66                             |
| 7.5                 | -25.99                             | 2.7                 | -23.34                             |
| 7.4                 | -26.41                             | 2.6                 | -23.44                             |
| 7.1                 | -26.1                              | 1.8                 | -23.99                             |
| 7.03                | -26.95                             | 0                   | -23.4                              |
| 6.1                 | -23.26                             |                     |                                    |

Table S3. Carbon and hydrogen isotope data, carbon preference indices (CPIs) and average chain length (ACL) data of leaf wax *n*-alkane for the Lodo Gulch section.

| Composite Height(m) | $\delta^{13}\text{C}_{27}$ | $\delta^{13}\text{C}_{29}$ | $\delta^{13}\text{C}_{31}$ | Composite Height(m) | $\delta^2\text{H}_{\text{C}27}$ | $\delta^2\text{H}_{\text{C}29}$ | $\delta^2\text{H}_{\text{C}31}$ |
|---------------------|----------------------------|----------------------------|----------------------------|---------------------|---------------------------------|---------------------------------|---------------------------------|
| 51.78               | -30.1                      | -30.4                      | -31.6                      | 51.78               | -173                            | -175                            | -169                            |
| 42.47               | -30.4                      | -30.5                      | -31.4                      | 42.47               | -182                            | -184                            | -176                            |
| 38.74               | -30.1                      | -30                        | -31.2                      | 38.74               | -173                            | -176                            | -169                            |
| 33.15               | -30.2                      | -30.2                      | -31.3                      | 33.15               | -173                            | -178                            | -173                            |
| 27.94               | -30                        | -30.2                      | -31.3                      | 27.94               | -179                            | -179                            | -177                            |
| 25.83               | -30.2                      | -29.8                      | -30.7                      | 25.83               | -178                            | -193                            | -196                            |
| 22.01               | -29.5                      | -29.3                      | -30.4                      | 22.01               | -189                            | -213                            | -209                            |
| 21.98               | -30.2                      | -32.2                      | -31.4                      | 21.98               | -164                            | -192                            | -232                            |
| 19.78               | -32                        | -32.3                      | -33.2                      | 19.78               | -171                            | -171                            | -170                            |
| 18.46               | -32.1                      | -32.4                      | -33.7                      | 18.46               | -150                            | -166                            | -168                            |
| 16.4                | -32.4                      | -32.8                      | -33.5                      | 16.4                | -166                            | -164                            | -164                            |
| 16.22               | -32.1                      | -32.6                      | -33.5                      | 16.22               | -166                            | -165                            | -167                            |
| 14.57               | -32.8                      | -33                        | -34.2                      | 14.57               | -188                            | -183                            | -198                            |
| 13.6                | -32.5                      | -33                        | -34                        | 13.6                |                                 |                                 |                                 |
| 11.21               | -32.4                      | -32.7                      | -33.8                      | 11.21               | -170                            | -168                            | -167                            |
| 10.92               | -32.3                      | -32.4                      | -33.5                      | 10.92               | -165                            | -168                            | -167                            |
| 10.02               | -32.6                      | -32.9                      | -34.1                      | 10.02               | -162                            | -167                            | -165                            |
| 9.42                | -32                        | -32.5                      | -33.3                      | 9.42                | -160                            | -169                            | -168                            |
| 8.83                | -32.4                      | -32.7                      | -34                        | 8.83                | -169                            | -168                            | -171                            |
| 8.53                | -32.3                      | -32.8                      | -34                        | 8.53                | -170                            | -166                            | -167                            |
| 8.35                | -29.1                      | -28.8                      | -29.4                      | 8.35                |                                 |                                 |                                 |
| 7.85                | -32.1                      | -32.4                      | -33.8                      | 7.85                | -168                            | -168                            | -170                            |
| 7.62                | -32.5                      | -33                        | -34                        | 7.62                |                                 |                                 |                                 |
| 7.35                | -35                        | -33.4                      | -35.9                      | 7.35                |                                 |                                 |                                 |
| 7.17                | -32.6                      | -32.9                      | -34                        | 7.17                | -162                            | -167                            | -166                            |
| 6.94                | -32.8                      | -33.2                      | -34.2                      | 6.94                | -166                            | -167                            | -167                            |
| 6.67                | -33.2                      | -33.2                      | -34.9                      | 6.67                | -170                            | -170                            | -171                            |
| 6.54                |                            | -29.3                      |                            | 6.54                |                                 |                                 |                                 |
| 6.26                | -29.9                      | -29.5                      | -34.5                      | 6.26                | -173                            | -202                            | -166                            |
| 5.95                | -29.2                      | -28.9                      | -29.9                      | 5.95                | -170                            | -179                            | -175                            |
| 5.69                | -30.1                      | -30                        | -30.7                      | 5.69                | -169                            | -175                            | -173                            |
| 4.24                | -29                        | -29                        | -29.9                      | 4.24                | -171                            | -175                            | -173                            |
| 3.01                | -29.4                      | -29.5                      | -30.3                      | 3.01                | -153                            | -154                            | -150                            |
| 2.24                | -29.1                      | -29.3                      | -30                        | 2.24                |                                 | -157                            | -144                            |

|                     |       |       |       |      |  |  |  |
|---------------------|-------|-------|-------|------|--|--|--|
| 1.99                | -28.6 | -28.6 | -29.4 | 1.99 |  |  |  |
| Composite Height(m) | CPI   | ACL   |       |      |  |  |  |
| 51.78               | 3.13  | 30.03 |       |      |  |  |  |
| 42.47               | 2.5   | 29.75 |       |      |  |  |  |
| 38.74               | 2.38  | 29.84 |       |      |  |  |  |
| 33.15               | 2.97  | 30.02 |       |      |  |  |  |
| 27.94               | 2.7   | 29.81 |       |      |  |  |  |
| 25.83               | 3.11  | 30.13 |       |      |  |  |  |
| 22.01               | 2.77  | 30.01 |       |      |  |  |  |
| 21.98               | 2.47  | 30.11 |       |      |  |  |  |
| 19.78               | 2.31  | 29.82 |       |      |  |  |  |
| 18.46               | 2.12  | 29.74 |       |      |  |  |  |
| 16.4                | 2.15  | 29.81 |       |      |  |  |  |
| 16.22               | 2.15  | 29.62 |       |      |  |  |  |
| 14.57               | 2.69  | 29.48 |       |      |  |  |  |
| 13.6                | 2.24  | 29.63 |       |      |  |  |  |
| 11.21               | 2.16  | 29.58 |       |      |  |  |  |
| 10.92               | 2.12  | 29.73 |       |      |  |  |  |
| 10.02               | 1.94  | 29.52 |       |      |  |  |  |
| 9.42                | 1.9   | 29.58 |       |      |  |  |  |
| 8.83                | 2.39  | 29.86 |       |      |  |  |  |
| 8.53                | 2.31  | 29.80 |       |      |  |  |  |
| 8.35                | 2.33  | 29.86 |       |      |  |  |  |
| 7.85                | 2.23  | 29.67 |       |      |  |  |  |
| 7.62                | 2.06  | 29.56 |       |      |  |  |  |
| 7.35                | 1.89  | 29.59 |       |      |  |  |  |
| 7.17                | 2.15  | 29.70 |       |      |  |  |  |
| 6.94                | 2.04  | 29.44 |       |      |  |  |  |
| 6.67                | 2.66  | 29.76 |       |      |  |  |  |
| 6.26                | 1.65  | 29.50 |       |      |  |  |  |
| 5.95                | 2.71  | 29.94 |       |      |  |  |  |
| 5.69                | 2.17  | 29.71 |       |      |  |  |  |
| 4.24                | 2.14  | 29.65 |       |      |  |  |  |
| 3.01                | 1.46  | 29.55 |       |      |  |  |  |
| 2.24                | 1.6   | 29.86 |       |      |  |  |  |
| 1.99                | 1.8   | 29.36 |       |      |  |  |  |

Table S4. Grain size data of different depth intervals for the Lodo Gulch section.

| Composite height(m) | Particle size( $\mu\text{m}$ ) | Volume    | Composite depth | Particle size( $\mu\text{m}$ ) | Volume     | Composite height(m) | Particle size( $\mu\text{m}$ ) | Volume    |
|---------------------|--------------------------------|-----------|-----------------|--------------------------------|------------|---------------------|--------------------------------|-----------|
| 1.8                 | 0.375198                       | 0.0388791 | 3.8             | 0.375198                       | 0.05264165 | 5.3                 | 0.375198                       | 0.0232027 |
| 1.8                 | 0.411878                       | 0.0692615 | 3.8             | 0.411878                       | 0.0937371  | 5.3                 | 0.411878                       | 0.0414056 |
| 1.8                 | 0.452145                       | 0.1018519 | 3.8             | 0.452145                       | 0.1374835  | 5.3                 | 0.452145                       | 0.0610345 |
| 1.8                 | 0.496347                       | 0.144389  | 3.8             | 0.496347                       | 0.1941835  | 5.3                 | 0.496347                       | 0.0866915 |
| 1.8                 | 0.544872                       | 0.1784025 | 3.8             | 0.544872                       | 0.238731   | 5.3                 | 0.544872                       | 0.107334  |
| 1.8                 | 0.59814                        | 0.2072315 | 3.8             | 0.59814                        | 0.2755165  | 5.3                 | 0.59814                        | 0.125182  |
| 1.8                 | 0.656615                       | 0.232371  | 3.8             | 0.656615                       | 0.306498   | 5.3                 | 0.656615                       | 0.141147  |
| 1.8                 | 0.720807                       | 0.255805  | 3.8             | 0.720807                       | 0.3343155  | 5.3                 | 0.720807                       | 0.156386  |
| 1.8                 | 0.791275                       | 0.273727  | 3.8             | 0.791275                       | 0.3539905  | 5.3                 | 0.791275                       | 0.168484  |
| 1.8                 | 0.868632                       | 0.2860565 | 3.8             | 0.868632                       | 0.3653515  | 5.3                 | 0.868632                       | 0.17767   |
| 1.8                 | 0.953552                       | 0.2942345 | 3.8             | 0.953552                       | 0.3704575  | 5.3                 | 0.953552                       | 0.184886  |
| 1.8                 | 1.04677                        | 0.299896  | 3.8             | 1.04677                        | 0.371698   | 5.3                 | 1.04677                        | 0.191078  |
| 1.8                 | 1.14911                        | 0.3046495 | 3.8             | 1.14911                        | 0.3716075  | 5.3                 | 1.14911                        | 0.197039  |
| 1.8                 | 1.26145                        | 0.3081665 | 3.8             | 1.26145                        | 0.3699555  | 5.3                 | 1.26145                        | 0.202657  |
| 1.8                 | 1.38477                        | 0.3125405 | 3.8             | 1.38477                        | 0.369693   | 5.3                 | 1.38477                        | 0.209297  |
| 1.8                 | 1.52015                        | 0.3193375 | 3.8             | 1.52015                        | 0.372944   | 5.3                 | 1.52015                        | 0.217929  |
| 1.8                 | 1.66876                        | 0.331607  | 3.8             | 1.66876                        | 0.383679   | 5.3                 | 1.66876                        | 0.230373  |
| 1.8                 | 1.8319                         | 0.3494975 | 3.8             | 1.8319                         | 0.4020535  | 5.3                 | 1.8319                         | 0.246654  |
| 1.8                 | 2.011                          | 0.374279  | 3.8             | 2.011                          | 0.429502   | 5.3                 | 2.011                          | 0.267705  |



|     |         |               |     |         |               |     |         |              |
|-----|---------|---------------|-----|---------|---------------|-----|---------|--------------|
| 1.8 | 2.2076  | 0.406<br>806  | 3.8 | 2.2076  | 0.466<br>651  | 5.3 | 2.2076  | 0.294<br>231 |
| 1.8 | 2.42342 | 0.448<br>7435 | 3.8 | 2.42342 | 0.514<br>8505 | 5.3 | 2.42342 | 0.327<br>443 |
| 1.8 | 2.66033 | 0.500<br>4145 | 3.8 | 2.66033 | 0.573<br>751  | 5.3 | 2.66033 | 0.367<br>476 |
| 1.8 | 2.92042 | 0.561<br>7415 | 3.8 | 2.92042 | 0.642<br>5045 | 5.3 | 2.92042 | 0.414<br>393 |
| 1.8 | 3.20592 | 0.632<br>606  | 3.8 | 3.20592 | 0.720<br>1125 | 5.3 | 3.20592 | 0.468<br>403 |
| 1.8 | 3.51934 | 0.712<br>3605 | 3.8 | 3.51934 | 0.804<br>7075 | 5.3 | 3.51934 | 0.529<br>483 |
| 1.8 | 3.8634  | 0.800<br>4755 | 3.8 | 3.8634  | 0.894<br>493  | 5.3 | 3.8634  | 0.597<br>468 |
| 1.8 | 4.2411  | 0.895<br>5    | 3.8 | 4.2411  | 0.986<br>803  | 5.3 | 4.2411  | 0.671<br>553 |
| 1.8 | 4.65572 | 0.996<br>4495 | 3.8 | 4.65572 | 1.080<br>03   | 5.3 | 4.65572 | 0.751<br>421 |
| 1.8 | 5.11087 | 1.101<br>8255 | 3.8 | 5.11087 | 1.172<br>31   | 5.3 | 5.11087 | 0.836<br>625 |
| 1.8 | 5.61052 | 1.210<br>675  | 3.8 | 5.61052 | 1.262<br>475  | 5.3 | 5.61052 | 0.926<br>996 |
| 1.8 | 6.15902 | 1.321<br>61   | 3.8 | 6.15902 | 1.348<br>675  | 5.3 | 6.15902 | 1.021<br>86  |
| 1.8 | 6.76114 | 1.433<br>3    | 3.8 | 6.76114 | 1.429<br>68   | 5.3 | 6.76114 | 1.120<br>56  |
| 1.8 | 7.42212 | 1.544<br>845  | 3.8 | 7.42212 | 1.505<br>47   | 5.3 | 7.42212 | 1.223<br>18  |
| 1.8 | 8.14773 | 1.654<br>94   | 3.8 | 8.14773 | 1.575<br>95   | 5.3 | 8.14773 | 1.330<br>08  |
| 1.8 | 8.94427 | 1.761<br>8    | 3.8 | 8.94427 | 1.640<br>025  | 5.3 | 8.94427 | 1.441<br>62  |
| 1.8 | 9.81869 | 1.861<br>46   | 3.8 | 9.81869 | 1.693<br>965  | 5.3 | 9.81869 | 1.556<br>37  |
| 1.8 | 10.7786 | 1.950<br>975  | 3.8 | 10.7786 | 1.736<br>79   | 5.3 | 10.7786 | 1.672<br>92  |
| 1.8 | 11.8323 | 2.028<br>68   | 3.8 | 11.8323 | 1.772<br>33   | 5.3 | 11.8323 | 1.789<br>93  |
| 1.8 | 12.9891 | 2.096<br>855  | 3.8 | 12.9891 | 1.811<br>145  | 5.3 | 12.9891 | 1.907<br>65  |
| 1.8 | 14.2589 | 2.158<br>55   | 3.8 | 14.2589 | 1.862<br>215  | 5.3 | 14.2589 | 2.024<br>68  |

|     |         |              |     |         |              |     |         |             |
|-----|---------|--------------|-----|---------|--------------|-----|---------|-------------|
| 1.8 | 15.6529 | 2.215<br>01  | 3.8 | 15.6529 | 1.926<br>015 | 5.3 | 15.6529 | 2.136<br>66 |
| 1.8 | 17.1832 | 2.263<br>865 | 3.8 | 17.1832 | 1.992<br>495 | 5.3 | 17.1832 | 2.237<br>1  |
| 1.8 | 18.863  | 2.298<br>995 | 3.8 | 18.863  | 2.046<br>875 | 5.3 | 18.863  | 2.321<br>7  |
| 1.8 | 20.7071 | 2.316<br>22  | 3.8 | 20.7071 | 2.083<br>685 | 5.3 | 20.7071 | 2.394<br>5  |
| 1.8 | 22.7315 | 2.314<br>755 | 3.8 | 22.7315 | 2.110<br>75  | 5.3 | 22.7315 | 2.466<br>86 |
| 1.8 | 24.9538 | 2.299<br>54  | 3.8 | 24.9538 | 2.146<br>45  | 5.3 | 24.9538 | 2.553<br>29 |
| 1.8 | 27.3934 | 2.278<br>13  | 3.8 | 27.3934 | 2.205<br>855 | 5.3 | 27.3934 | 2.661<br>84 |
| 1.8 | 30.0714 | 2.257<br>635 | 3.8 | 30.0714 | 2.290<br>005 | 5.3 | 30.0714 | 2.788<br>55 |
| 1.8 | 33.0113 | 2.245<br>14  | 3.8 | 33.0113 | 2.386<br>545 | 5.3 | 33.0113 | 2.918<br>72 |
| 1.8 | 36.2385 | 2.249<br>405 | 3.8 | 36.2385 | 2.478<br>265 | 5.3 | 36.2385 | 3.032<br>11 |
| 1.8 | 39.7813 | 2.283<br>275 | 3.8 | 39.7813 | 2.556<br>72  | 5.3 | 39.7813 | 3.113<br>68 |
| 1.8 | 43.6704 | 2.363<br>33  | 3.8 | 43.6704 | 2.629<br>825 | 5.3 | 43.6704 | 3.158<br>55 |
| 1.8 | 47.9397 | 2.503<br>53  | 3.8 | 47.9397 | 2.716<br>27  | 5.3 | 47.9397 | 3.172<br>07 |
| 1.8 | 52.6264 | 2.706<br>91  | 3.8 | 52.6264 | 2.832<br>275 | 5.3 | 52.6264 | 3.166<br>45 |
| 1.8 | 57.7713 | 2.960<br>38  | 3.8 | 57.7713 | 2.981<br>635 | 5.3 | 57.7713 | 3.154<br>29 |
| 1.8 | 63.4192 | 3.230<br>61  | 3.8 | 63.4192 | 3.148<br>005 | 5.3 | 63.4192 | 3.142<br>9  |
| 1.8 | 69.6192 | 3.474<br>66  | 3.8 | 69.6192 | 3.304<br>615 | 5.3 | 69.6192 | 3.134<br>72 |
| 1.8 | 76.4253 | 3.663<br>52  | 3.8 | 76.4253 | 3.437<br>895 | 5.3 | 76.4253 | 3.124<br>21 |
| 1.8 | 83.8969 | 3.782<br>145 | 3.8 | 83.8969 | 3.544<br>755 | 5.3 | 83.8969 | 3.104<br>16 |
| 1.8 | 92.0988 | 3.834<br>195 | 3.8 | 92.0988 | 3.634<br>985 | 5.3 | 92.0988 | 3.088<br>32 |
| 1.8 | 101.103 | 3.803<br>56  | 3.8 | 101.103 | 3.687<br>695 | 5.3 | 101.103 | 3.086<br>82 |

|     |              |                    |     |              |                    |     |              |                    |
|-----|--------------|--------------------|-----|--------------|--------------------|-----|--------------|--------------------|
| 1.8 | 110.987      | 3.616<br>41        | 3.8 | 110.987      | 3.610<br>69        | 5.3 | 110.987      | 3.109<br>84        |
| 1.8 | 121.837      | 3.197<br>545       | 3.8 | 121.837      | 3.295<br>475       | 5.3 | 121.837      | 3.115<br>76        |
| 1.8 | 133.748      | 2.508<br>195       | 3.8 | 133.748      | 2.668<br>545       | 5.3 | 133.748      | 2.995<br>67        |
| 1.8 | 146.824      | 1.592<br>365       | 3.8 | 146.824      | 1.785<br>215       | 5.3 | 146.824      | 2.652<br>66        |
| 1.8 | 161.177      | 0.738<br>8925      | 3.8 | 161.177      | 0.885<br>203       | 5.3 | 161.177      | 2.044<br>68        |
| 1.8 | 176.935      | 0.207<br>6         | 3.8 | 176.935      | 0.278<br>3455      | 5.3 | 176.935      | 1.210<br>95        |
| 1.8 | 194.232      | 0.029<br>9191      | 3.8 | 194.232      | 0.043<br>7586      | 5.3 | 194.232      | 0.494<br>602       |
| 1.8 | 213.221      | 0.001<br>4994<br>5 | 3.8 | 213.221      | 0.002<br>2085<br>9 | 5.3 | 213.221      | 0.099<br>4463      |
| 1.8 | 234.066      | 0                  | 3.8 | 234.066      | 0                  | 5.3 | 234.066      | 0.008<br>4070<br>5 |
| 1.8 | 256.948      | 0                  | 3.8 | 256.948      | 0                  | 5.3 | 256.948      | 0                  |
| 5.4 | 0.37519<br>8 | 0.024<br>3333      | 5.5 | 0.37519<br>8 | 0.024<br>931       | 5.6 | 0.37519<br>8 | 0.026<br>6626      |
| 5.4 | 0.41187<br>8 | 0.043<br>4189      | 5.5 | 0.41187<br>8 | 0.044<br>4959      | 5.6 | 0.41187<br>8 | 0.047<br>546       |
| 5.4 | 0.45214<br>5 | 0.063<br>9942      | 5.5 | 0.45214<br>5 | 0.065<br>5773      | 5.6 | 0.45214<br>5 | 0.070<br>0698      |
| 5.4 | 0.49634<br>7 | 0.090<br>8739      | 5.5 | 0.49634<br>7 | 0.093<br>1007      | 5.6 | 0.49634<br>7 | 0.099<br>5787      |
| 5.4 | 0.54487<br>2 | 0.112<br>439       | 5.5 | 0.54487<br>2 | 0.115<br>133       | 5.6 | 0.54487<br>2 | 0.123<br>451       |
| 5.4 | 0.59814      | 0.131<br>014       | 5.5 | 0.59814      | 0.134<br>076       | 5.6 | 0.59814      | 0.144<br>175       |
| 5.4 | 0.65661<br>5 | 0.147<br>547       | 5.5 | 0.65661<br>5 | 0.150<br>876       | 5.6 | 0.65661<br>5 | 0.162<br>837       |
| 5.4 | 0.72080<br>7 | 0.163<br>263       | 5.5 | 0.72080<br>7 | 0.166<br>782       | 5.6 | 0.72080<br>7 | 0.180<br>832       |
| 5.4 | 0.79127<br>5 | 0.175<br>593       | 5.5 | 0.79127<br>5 | 0.179<br>129       | 5.6 | 0.79127<br>5 | 0.195<br>475       |
| 5.4 | 0.86863<br>2 | 0.184<br>753       | 5.5 | 0.86863<br>2 | 0.188<br>15        | 5.6 | 0.86863<br>2 | 0.206<br>983       |
| 5.4 | 0.95355<br>2 | 0.191<br>723       | 5.5 | 0.95355<br>2 | 0.194<br>801       | 5.6 | 0.95355<br>2 | 0.216<br>463       |

|     |         |              |     |         |              |     |         |              |
|-----|---------|--------------|-----|---------|--------------|-----|---------|--------------|
| 5.4 | 1.04677 | 0.197<br>535 | 5.5 | 1.04677 | 0.200<br>12  | 5.6 | 1.04677 | 0.225<br>088 |
| 5.4 | 1.14911 | 0.203<br>042 | 5.5 | 1.14911 | 0.204<br>94  | 5.6 | 1.14911 | 0.233<br>805 |
| 5.4 | 1.26145 | 0.208<br>131 | 5.5 | 1.26145 | 0.209<br>15  | 5.6 | 1.26145 | 0.242<br>43  |
| 5.4 | 1.38477 | 0.214<br>262 | 5.5 | 1.38477 | 0.214<br>201 | 5.6 | 1.38477 | 0.252<br>431 |
| 5.4 | 1.52015 | 0.222<br>532 | 5.5 | 1.52015 | 0.221<br>169 | 5.6 | 1.52015 | 0.264<br>892 |
| 5.4 | 1.66876 | 0.234<br>959 | 5.5 | 1.66876 | 0.232<br>066 | 5.6 | 1.66876 | 0.281<br>857 |
| 5.4 | 1.8319  | 0.251<br>657 | 5.5 | 1.8319  | 0.246<br>967 | 5.6 | 1.8319  | 0.303<br>261 |
| 5.4 | 2.011   | 0.273<br>67  | 5.5 | 2.011   | 0.266<br>898 | 5.6 | 2.011   | 0.329<br>954 |
| 5.4 | 2.2076  | 0.301<br>836 | 5.5 | 2.2076  | 0.292<br>613 | 5.6 | 2.2076  | 0.362<br>511 |
| 5.4 | 2.42342 | 0.337<br>605 | 5.5 | 2.42342 | 0.325<br>511 | 5.6 | 2.42342 | 0.402<br>107 |
| 5.4 | 2.66033 | 0.381<br>296 | 5.5 | 2.66033 | 0.365<br>849 | 5.6 | 2.66033 | 0.448<br>687 |
| 5.4 | 2.92042 | 0.433<br>092 | 5.5 | 2.92042 | 0.413<br>799 | 5.6 | 2.92042 | 0.501<br>975 |
| 5.4 | 3.20592 | 0.493<br>217 | 5.5 | 3.20592 | 0.469<br>533 | 5.6 | 3.20592 | 0.561<br>752 |
| 5.4 | 3.51934 | 0.561<br>696 | 5.5 | 3.51934 | 0.533<br>007 | 5.6 | 3.51934 | 0.627<br>631 |
| 5.4 | 3.8634  | 0.638<br>408 | 5.5 | 3.8634  | 0.604<br>028 | 5.6 | 3.8634  | 0.699<br>148 |
| 5.4 | 4.2411  | 0.722<br>51  | 5.5 | 4.2411  | 0.681<br>817 | 5.6 | 4.2411  | 0.775<br>135 |
| 5.4 | 4.65572 | 0.813<br>452 | 5.5 | 4.65572 | 0.765<br>905 | 5.6 | 4.65572 | 0.854<br>821 |
| 5.4 | 5.11087 | 0.910<br>405 | 5.5 | 5.11087 | 0.855<br>49  | 5.6 | 5.11087 | 0.937<br>37  |
| 5.4 | 5.61052 | 1.012<br>85  | 5.5 | 5.61052 | 0.950<br>001 | 5.6 | 5.61052 | 1.022<br>5   |
| 5.4 | 6.15902 | 1.119<br>83  | 5.5 | 6.15902 | 1.048<br>51  | 5.6 | 6.15902 | 1.109<br>58  |
| 5.4 | 6.76114 | 1.230<br>32  | 5.5 | 6.76114 | 1.150<br>2   | 5.6 | 6.76114 | 1.197<br>99  |

|     |         |             |     |         |             |     |         |             |
|-----|---------|-------------|-----|---------|-------------|-----|---------|-------------|
| 5.4 | 7.42212 | 1.343<br>74 | 5.5 | 7.42212 | 1.254<br>69 | 5.6 | 7.42212 | 1.287<br>64 |
| 5.4 | 8.14773 | 1.459<br>65 | 5.5 | 8.14773 | 1.361<br>57 | 5.6 | 8.14773 | 1.378<br>81 |
| 5.4 | 8.94427 | 1.577<br>58 | 5.5 | 8.94427 | 1.470<br>26 | 5.6 | 8.94427 | 1.472<br>13 |
| 5.4 | 9.81869 | 1.695<br>54 | 5.5 | 9.81869 | 1.578<br>99 | 5.6 | 9.81869 | 1.566<br>95 |
| 5.4 | 10.7786 | 1.811<br>77 | 5.5 | 10.7786 | 1.686<br>69 | 5.6 | 10.7786 | 1.663<br>13 |
| 5.4 | 11.8323 | 1.924<br>85 | 5.5 | 11.8323 | 1.792<br>89 | 5.6 | 11.8323 | 1.761<br>12 |
| 5.4 | 12.9891 | 2.035<br>68 | 5.5 | 12.9891 | 1.899<br>07 | 5.6 | 12.9891 | 1.863<br>99 |
| 5.4 | 14.2589 | 2.145<br>26 | 5.5 | 14.2589 | 2.006<br>81 | 5.6 | 14.2589 | 1.974<br>39 |
| 5.4 | 15.6529 | 2.253<br>74 | 5.5 | 15.6529 | 2.117<br>53 | 5.6 | 15.6529 | 2.092<br>39 |
| 5.4 | 17.1832 | 2.359<br>95 | 5.5 | 17.1832 | 2.232<br>87 | 5.6 | 17.1832 | 2.214<br>38 |
| 5.4 | 18.863  | 2.462<br>63 | 5.5 | 18.863  | 2.355<br>15 | 5.6 | 18.863  | 2.335<br>06 |
| 5.4 | 20.7071 | 2.563<br>77 | 5.5 | 20.7071 | 2.488<br>42 | 5.6 | 20.7071 | 2.452<br>96 |
| 5.4 | 22.7315 | 2.666<br>77 | 5.5 | 22.7315 | 2.634<br>81 | 5.6 | 22.7315 | 2.570<br>73 |
| 5.4 | 24.9538 | 2.775<br>06 | 5.5 | 24.9538 | 2.792<br>65 | 5.6 | 24.9538 | 2.694<br>21 |
| 5.4 | 27.3934 | 2.886<br>24 | 5.5 | 27.3934 | 2.953<br>4  | 5.6 | 27.3934 | 2.825<br>11 |
| 5.4 | 30.0714 | 2.990<br>68 | 5.5 | 30.0714 | 3.103<br>58 | 5.6 | 30.0714 | 2.956<br>59 |
| 5.4 | 33.0113 | 3.074<br>35 | 5.5 | 33.0113 | 3.230<br>07 | 5.6 | 33.0113 | 3.073<br>8  |
| 5.4 | 36.2385 | 3.124<br>41 | 5.5 | 36.2385 | 3.324<br>85 | 5.6 | 36.2385 | 3.158<br>2  |
| 5.4 | 39.7813 | 3.137<br>6  | 5.5 | 39.7813 | 3.389<br>17 | 5.6 | 39.7813 | 3.197<br>17 |
| 5.4 | 43.6704 | 3.120<br>84 | 5.5 | 43.6704 | 3.429<br>71 | 5.6 | 43.6704 | 3.188<br>86 |
| 5.4 | 47.9397 | 3.088<br>96 | 5.5 | 47.9397 | 3.453<br>36 | 5.6 | 47.9397 | 3.141<br>3  |

|     |              |                    |     |              |                    |     |              |                    |
|-----|--------------|--------------------|-----|--------------|--------------------|-----|--------------|--------------------|
| 5.4 | 52.6264      | 3.057<br>12        | 5.5 | 52.6264      | 3.461<br>84        | 5.6 | 52.6264      | 3.067<br>65        |
| 5.4 | 57.7713      | 3.032<br>78        | 5.5 | 57.7713      | 3.448<br>87        | 5.6 | 57.7713      | 2.979<br>2         |
| 5.4 | 63.4192      | 3.015<br>45        | 5.5 | 63.4192      | 3.404<br>01        | 5.6 | 63.4192      | 2.881<br>26        |
| 5.4 | 69.6192      | 2.997<br>04        | 5.5 | 69.6192      | 3.318<br>24        | 5.6 | 69.6192      | 2.775<br>12        |
| 5.4 | 76.4253      | 2.969<br>93        | 5.5 | 76.4253      | 3.189<br>83        | 5.6 | 76.4253      | 2.660<br>69        |
| 5.4 | 83.8969      | 2.945<br>42        | 5.5 | 83.8969      | 3.035<br>6         | 5.6 | 83.8969      | 2.543<br>11        |
| 5.4 | 92.0988      | 2.942<br>18        | 5.5 | 92.0988      | 2.888<br>11        | 5.6 | 92.0988      | 2.453<br>13        |
| 5.4 | 101.103      | 2.975<br>41        | 5.5 | 101.103      | 2.776<br>33        | 5.6 | 101.103      | 2.431<br>19        |
| 5.4 | 110.987      | 3.017<br>86        | 5.5 | 110.987      | 2.702<br>77        | 5.6 | 110.987      | 2.511<br>82        |
| 5.4 | 121.837      | 2.973<br>22        | 5.5 | 121.837      | 2.610<br>86        | 5.6 | 121.837      | 2.676<br>89        |
| 5.4 | 133.748      | 2.727<br>46        | 5.5 | 133.748      | 2.405<br>8         | 5.6 | 133.748      | 2.816<br>59        |
| 5.4 | 146.824      | 2.214<br>26        | 5.5 | 146.824      | 2.013<br>26        | 5.6 | 146.824      | 2.769<br>52        |
| 5.4 | 161.177      | 1.494<br>67        | 5.5 | 161.177      | 1.442<br>37        | 5.6 | 161.177      | 2.403<br>46        |
| 5.4 | 176.935      | 0.754<br>231       | 5.5 | 176.935      | 0.787<br>517       | 5.6 | 176.935      | 1.732<br>41        |
| 5.4 | 194.232      | 0.248<br>868       | 5.5 | 194.232      | 0.291<br>372       | 5.6 | 194.232      | 0.930<br>105       |
| 5.4 | 213.221      | 0.041<br>2991      | 5.5 | 213.221      | 0.053<br>874       | 5.6 | 213.221      | 0.328<br>332       |
| 5.4 | 234.066      | 0.002<br>4490<br>7 | 5.5 | 234.066      | 0.003<br>9553<br>2 | 5.6 | 234.066      | 0.057<br>8222      |
| 5.4 | 256.948      | 0                  | 5.5 | 256.948      | 0                  | 5.6 | 256.948      | 0.003<br>7807<br>6 |
| 5.4 | 282.068      | 0                  | 5.5 | 282.068      | 0                  | 5.6 | 282.068      | 0                  |
| 5.7 | 0.37519<br>8 | 0.025<br>3939      | 5.8 | 0.37519<br>8 | 0.021<br>897       | 5.9 | 0.37519<br>8 | 0.029<br>2061      |
| 5.7 | 0.41187<br>8 | 0.045<br>2862      | 5.8 | 0.41187<br>8 | 0.039<br>0672      | 5.9 | 0.41187<br>8 | 0.052<br>0917      |

|     |              |               |     |              |               |     |              |              |
|-----|--------------|---------------|-----|--------------|---------------|-----|--------------|--------------|
| 5.7 | 0.45214<br>5 | 0.066<br>6887 | 5.8 | 0.45214<br>5 | 0.057<br>582  | 5.9 | 0.45214<br>5 | 0.076<br>735 |
| 5.7 | 0.49634<br>7 | 0.094<br>6412 | 5.8 | 0.49634<br>7 | 0.081<br>7232 | 5.9 | 0.49634<br>7 | 0.108<br>978 |
| 5.7 | 0.54487<br>2 | 0.117<br>052  | 5.8 | 0.54487<br>2 | 0.101<br>048  | 5.9 | 0.54487<br>2 | 0.135<br>01  |
| 5.7 | 0.59814      | 0.136<br>282  | 5.8 | 0.59814      | 0.117<br>699  | 5.9 | 0.59814      | 0.157<br>562 |
| 5.7 | 0.65661<br>5 | 0.153<br>332  | 5.8 | 0.65661<br>5 | 0.132<br>614  | 5.9 | 0.65661<br>5 | 0.177<br>807 |
| 5.7 | 0.72080<br>7 | 0.169<br>514  | 5.8 | 0.72080<br>7 | 0.146<br>88   | 5.9 | 0.72080<br>7 | 0.197<br>253 |
| 5.7 | 0.79127<br>5 | 0.182<br>246  | 5.8 | 0.79127<br>5 | 0.158<br>195  | 5.9 | 0.79127<br>5 | 0.213<br>011 |
| 5.7 | 0.86863<br>2 | 0.191<br>711  | 5.8 | 0.86863<br>2 | 0.166<br>843  | 5.9 | 0.86863<br>2 | 0.225<br>375 |
| 5.7 | 0.95355<br>2 | 0.198<br>95   | 5.8 | 0.95355<br>2 | 0.173<br>898  | 5.9 | 0.95355<br>2 | 0.235<br>581 |
| 5.7 | 1.04677      | 0.205<br>117  | 5.8 | 1.04677      | 0.180<br>375  | 5.9 | 1.04677      | 0.244<br>928 |
| 5.7 | 1.14911      | 0.211<br>229  | 5.8 | 1.14911      | 0.187<br>021  | 5.9 | 1.14911      | 0.254<br>534 |
| 5.7 | 1.26145      | 0.217<br>191  | 5.8 | 1.26145      | 0.193<br>726  | 5.9 | 1.26145      | 0.264<br>318 |
| 5.7 | 1.38477      | 0.224<br>492  | 5.8 | 1.38477      | 0.201<br>901  | 5.9 | 1.38477      | 0.275<br>976 |
| 5.7 | 1.52015      | 0.234<br>271  | 5.8 | 1.52015      | 0.212<br>599  | 5.9 | 1.52015      | 0.290<br>731 |
| 5.7 | 1.66876      | 0.248<br>69   | 5.8 | 1.66876      | 0.227<br>54   | 5.9 | 1.66876      | 0.310<br>87  |
| 5.7 | 1.8319       | 0.267<br>914  | 5.8 | 1.8319       | 0.246<br>588  | 5.9 | 1.8319       | 0.336<br>454 |
| 5.7 | 2.011        | 0.292<br>971  | 5.8 | 2.011        | 0.270<br>493  | 5.9 | 2.011        | 0.368<br>581 |
| 5.7 | 2.2076       | 0.324<br>587  | 5.8 | 2.2076       | 0.299<br>914  | 5.9 | 2.2076       | 0.407<br>99  |
| 5.7 | 2.42342      | 0.364<br>146  | 5.8 | 2.42342      | 0.335<br>949  | 5.9 | 2.42342      | 0.455<br>989 |
| 5.7 | 2.66033      | 0.411<br>95   | 5.8 | 2.66033      | 0.378<br>418  | 5.9 | 2.66033      | 0.512<br>556 |
| 5.7 | 2.92042      | 0.468<br>09   | 5.8 | 2.92042      | 0.426<br>861  | 5.9 | 2.92042      | 0.577<br>542 |

|     |         |              |     |         |              |     |         |              |
|-----|---------|--------------|-----|---------|--------------|-----|---------|--------------|
| 5.7 | 3.20592 | 0.532<br>595 | 5.8 | 3.20592 | 0.481<br>119 | 5.9 | 3.20592 | 0.650<br>889 |
| 5.7 | 3.51934 | 0.605<br>185 | 5.8 | 3.51934 | 0.541<br>052 | 5.9 | 3.51934 | 0.732<br>236 |
| 5.7 | 3.8634  | 0.685<br>573 | 5.8 | 3.8634  | 0.606<br>363 | 5.9 | 3.8634  | 0.820<br>983 |
| 5.7 | 4.2411  | 0.772<br>826 | 5.8 | 4.2411  | 0.675<br>799 | 5.9 | 4.2411  | 0.915<br>81  |
| 5.7 | 4.65572 | 0.866<br>29  | 5.8 | 4.65572 | 0.748<br>539 | 5.9 | 4.65572 | 1.016        |
| 5.7 | 5.11087 | 0.964<br>873 | 5.8 | 5.11087 | 0.824<br>122 | 5.9 | 5.11087 | 1.120<br>79  |
| 5.7 | 5.61052 | 1.067<br>83  | 5.8 | 5.61052 | 0.902<br>903 | 5.9 | 5.61052 | 1.229<br>78  |
| 5.7 | 6.15902 | 1.174<br>14  | 5.8 | 6.15902 | 0.984<br>673 | 5.9 | 6.15902 | 1.341<br>92  |
| 5.7 | 6.76114 | 1.282<br>9   | 5.8 | 6.76114 | 1.068<br>78  | 5.9 | 6.76114 | 1.456<br>25  |
| 5.7 | 7.42212 | 1.393<br>52  | 5.8 | 7.42212 | 1.155<br>35  | 5.9 | 7.42212 | 1.572<br>68  |
| 5.7 | 8.14773 | 1.505<br>15  | 5.8 | 8.14773 | 1.245<br>72  | 5.9 | 8.14773 | 1.691<br>52  |
| 5.7 | 8.94427 | 1.616<br>81  | 5.8 | 8.94427 | 1.342<br>42  | 5.9 | 8.94427 | 1.812<br>65  |
| 5.7 | 9.81869 | 1.726<br>32  | 5.8 | 9.81869 | 1.446<br>18  | 5.9 | 9.81869 | 1.933<br>82  |
| 5.7 | 10.7786 | 1.832<br>16  | 5.8 | 10.7786 | 1.556<br>98  | 5.9 | 10.7786 | 2.052<br>82  |
| 5.7 | 11.8323 | 1.933<br>15  | 5.8 | 11.8323 | 1.674<br>41  | 5.9 | 11.8323 | 2.168<br>66  |
| 5.7 | 12.9891 | 2.030<br>14  | 5.8 | 12.9891 | 1.800<br>84  | 5.9 | 12.9891 | 2.282<br>94  |
| 5.7 | 14.2589 | 2.124<br>13  | 5.8 | 14.2589 | 1.937<br>41  | 5.9 | 14.2589 | 2.395<br>67  |
| 5.7 | 15.6529 | 2.215<br>9   | 5.8 | 15.6529 | 2.079<br>39  | 5.9 | 15.6529 | 2.502<br>29  |
| 5.7 | 17.1832 | 2.305<br>58  | 5.8 | 17.1832 | 2.213<br>27  | 5.9 | 17.1832 | 2.594<br>26  |
| 5.7 | 18.863  | 2.392<br>79  | 5.8 | 18.863  | 2.321<br>63  | 5.9 | 18.863  | 2.664<br>63  |
| 5.7 | 20.7071 | 2.478<br>88  | 5.8 | 20.7071 | 2.396<br>81  | 5.9 | 20.7071 | 2.716<br>3   |



|     |         |             |     |         |             |     |         |             |
|-----|---------|-------------|-----|---------|-------------|-----|---------|-------------|
| 5.7 | 22.7315 | 2.565<br>15 | 5.8 | 22.7315 | 2.447<br>89 | 5.9 | 22.7315 | 2.761<br>73 |
| 5.7 | 24.9538 | 2.653<br>2  | 5.8 | 24.9538 | 2.499<br>95 | 5.9 | 24.9538 | 2.817<br>35 |
| 5.7 | 27.3934 | 2.742<br>18 | 5.8 | 27.3934 | 2.578<br>17 | 5.9 | 27.3934 | 2.891<br>61 |
| 5.7 | 30.0714 | 2.828<br>41 | 5.8 | 30.0714 | 2.691<br>7  | 5.9 | 30.0714 | 2.978<br>36 |
| 5.7 | 33.0113 | 2.906<br>53 | 5.8 | 33.0113 | 2.827<br>2  | 5.9 | 33.0113 | 3.059<br>18 |
| 5.7 | 36.2385 | 2.970<br>3  | 5.8 | 36.2385 | 2.952<br>87 | 5.9 | 36.2385 | 3.112<br>84 |
| 5.7 | 39.7813 | 3.015<br>69 | 5.8 | 39.7813 | 3.037<br>65 | 5.9 | 39.7813 | 3.127<br>55 |
| 5.7 | 43.6704 | 3.040<br>19 | 5.8 | 43.6704 | 3.068       | 5.9 | 43.6704 | 3.105<br>8  |
| 5.7 | 47.9397 | 3.043<br>4  | 5.8 | 47.9397 | 3.054<br>36 | 5.9 | 47.9397 | 3.061<br>01 |
| 5.7 | 52.6264 | 3.027<br>71 | 5.8 | 52.6264 | 3.024<br>66 | 5.9 | 52.6264 | 3.007<br>01 |
| 5.7 | 57.7713 | 2.997<br>99 | 5.8 | 57.7713 | 3.006<br>94 | 5.9 | 57.7713 | 2.950<br>35 |
| 5.7 | 63.4192 | 2.961<br>29 | 5.8 | 63.4192 | 3.014<br>88 | 5.9 | 63.4192 | 2.888<br>4  |
| 5.7 | 69.6192 | 2.925<br>74 | 5.8 | 69.6192 | 3.046<br>44 | 5.9 | 69.6192 | 2.813<br>95 |
| 5.7 | 76.4253 | 2.896<br>02 | 5.8 | 76.4253 | 3.085<br>42 | 5.9 | 76.4253 | 2.730<br>24 |
| 5.7 | 83.8969 | 2.877<br>73 | 5.8 | 83.8969 | 3.116<br>64 | 5.9 | 83.8969 | 2.651<br>85 |
| 5.7 | 92.0988 | 2.883<br>82 | 5.8 | 92.0988 | 3.156       | 5.9 | 92.0988 | 2.596<br>52 |
| 5.7 | 101.103 | 2.917<br>42 | 5.8 | 101.103 | 3.220<br>69 | 5.9 | 101.103 | 2.563<br>78 |
| 5.7 | 110.987 | 2.965<br>34 | 5.8 | 110.987 | 3.326<br>5  | 5.9 | 110.987 | 2.501<br>65 |
| 5.7 | 121.837 | 2.962<br>44 | 5.8 | 121.837 | 3.422<br>29 | 5.9 | 121.837 | 2.324<br>72 |
| 5.7 | 133.748 | 2.801<br>61 | 5.8 | 133.748 | 3.371<br>54 | 5.9 | 133.748 | 1.959<br>67 |
| 5.7 | 146.824 | 2.404<br>99 | 5.8 | 146.824 | 3.045<br>79 | 5.9 | 146.824 | 1.409<br>58 |

|     |              |                    |      |              |                    |      |              |                    |
|-----|--------------|--------------------|------|--------------|--------------------|------|--------------|--------------------|
| 5.7 | 161.177      | 1.777<br>39        | 5.8  | 161.177      | 2.385<br>45        | 5.9  | 161.177      | 0.769<br>017       |
| 5.7 | 176.935      | 1.005<br>69        | 5.8  | 176.935      | 1.460<br>97        | 5.9  | 176.935      | 0.281<br>066       |
| 5.7 | 194.232      | 0.390<br>129       | 5.8  | 194.232      | 0.630<br>722       | 5.9  | 194.232      | 0.051<br>2121      |
| 5.7 | 213.221      | 0.075<br>2133      | 5.8  | 213.221      | 0.148<br>29        | 5.9  | 213.221      | 0.003<br>6026<br>5 |
| 5.7 | 234.066      | 0.005<br>9577<br>7 | 5.8  | 234.066      | 0.016<br>2189      | 5.9  | 234.066      | 0                  |
| 5.7 | 256.948      | 0                  | 5.8  | 256.948      | 0.000<br>1765<br>6 | 5.9  | 256.948      | 0                  |
| 5.7 | 282.068      | 0                  | 5.8  | 282.068      | 0                  | 5.9  | 282.068      | 0                  |
| 6.1 | 0.37519<br>8 | 0.033<br>477       | 6.22 | 0.37519<br>8 | 0.030<br>9354      | 6.36 | 0.37519<br>8 | 0.025<br>6386      |
| 6.1 | 0.41187<br>8 | 0.059<br>7107      | 6.22 | 0.41187<br>8 | 0.055<br>2017      | 6.36 | 0.41187<br>8 | 0.045<br>7722      |
| 6.1 | 0.45214<br>5 | 0.087<br>9543      | 6.22 | 0.45214<br>5 | 0.081<br>3333      | 6.36 | 0.45214<br>5 | 0.067<br>5243      |
| 6.1 | 0.49634<br>7 | 0.124<br>913       | 6.22 | 0.49634<br>7 | 0.115<br>428       | 6.36 | 0.49634<br>7 | 0.095<br>9542<br>5 |
| 6.1 | 0.54487<br>2 | 0.154<br>785       | 6.22 | 0.54487<br>2 | 0.142<br>706       | 6.36 | 0.54487<br>2 | 0.118<br>7665      |
| 6.1 | 0.59814      | 0.180<br>692       | 6.22 | 0.59814      | 0.166<br>112       | 6.36 | 0.59814      | 0.138<br>4445      |
| 6.1 | 0.65661<br>5 | 0.203<br>984       | 6.22 | 0.65661<br>5 | 0.186<br>846       | 6.36 | 0.65661<br>5 | 0.155<br>956       |
| 6.1 | 0.72080<br>7 | 0.226<br>377       | 6.22 | 0.72080<br>7 | 0.206<br>446       | 6.36 | 0.72080<br>7 | 0.172<br>549       |
| 6.1 | 0.79127<br>5 | 0.244<br>589       | 6.22 | 0.79127<br>5 | 0.221<br>658       | 6.36 | 0.79127<br>5 | 0.185<br>3965      |
| 6.1 | 0.86863<br>2 | 0.258<br>969       | 6.22 | 0.86863<br>2 | 0.232<br>765       | 6.36 | 0.86863<br>2 | 0.194<br>703       |
| 6.1 | 0.95355<br>2 | 0.270<br>948       | 6.22 | 0.95355<br>2 | 0.241<br>053       | 6.36 | 0.95355<br>2 | 0.201<br>42        |
| 6.1 | 1.04677      | 0.282<br>005       | 6.22 | 1.04677      | 0.247<br>868       | 6.36 | 1.04677      | 0.206<br>5285      |
| 6.1 | 1.14911      | 0.293<br>404       | 6.22 | 1.14911      | 0.254<br>348       | 6.36 | 1.14911      | 0.210<br>8065      |

|     |         |              |      |         |              |      |         |               |
|-----|---------|--------------|------|---------|--------------|------|---------|---------------|
| 6.1 | 1.26145 | 0.305<br>062 | 6.22 | 1.26145 | 0.260<br>431 | 6.36 | 1.26145 | 0.214<br>1005 |
| 6.1 | 1.38477 | 0.318<br>949 | 6.22 | 1.38477 | 0.268<br>1   | 6.36 | 1.38477 | 0.217<br>976  |
| 6.1 | 1.52015 | 0.336<br>465 | 6.22 | 1.52015 | 0.278<br>879 | 6.36 | 1.52015 | 0.223<br>635  |
| 6.1 | 1.66876 | 0.360<br>165 | 6.22 | 1.66876 | 0.295<br>449 | 6.36 | 1.66876 | 0.233<br>2575 |
| 6.1 | 1.8319  | 0.390<br>08  | 6.22 | 1.8319  | 0.318<br>085 | 6.36 | 1.8319  | 0.247<br>0305 |
| 6.1 | 2.011   | 0.427<br>487 | 6.22 | 2.011   | 0.348<br>348 | 6.36 | 2.011   | 0.266<br>279  |
| 6.1 | 2.2076  | 0.473<br>255 | 6.22 | 2.2076  | 0.387<br>551 | 6.36 | 2.2076  | 0.292<br>1925 |
| 6.1 | 2.42342 | 0.528<br>843 | 6.22 | 2.42342 | 0.437<br>8   | 6.36 | 2.42342 | 0.326<br>7315 |
| 6.1 | 2.66033 | 0.594<br>099 | 6.22 | 2.66033 | 0.499<br>675 | 6.36 | 2.66033 | 0.370<br>634  |
| 6.1 | 2.92042 | 0.668<br>794 | 6.22 | 2.92042 | 0.573<br>622 | 6.36 | 2.92042 | 0.424<br>618  |
| 6.1 | 3.20592 | 0.752<br>86  | 6.22 | 3.20592 | 0.660<br>174 | 6.36 | 3.20592 | 0.489<br>517  |
| 6.1 | 3.51934 | 0.845<br>95  | 6.22 | 3.51934 | 0.759<br>673 | 6.36 | 3.51934 | 0.566<br>0955 |
| 6.1 | 3.8634  | 0.947<br>26  | 6.22 | 3.8634  | 0.872<br>053 | 6.36 | 3.8634  | 0.654<br>878  |
| 6.1 | 4.2411  | 1.055<br>09  | 6.22 | 4.2411  | 0.996<br>201 | 6.36 | 4.2411  | 0.755<br>595  |
| 6.1 | 4.65572 | 1.168<br>49  | 6.22 | 4.65572 | 1.131<br>3   | 6.36 | 4.65572 | 0.868<br>16   |
| 6.1 | 5.11087 | 1.286<br>72  | 6.22 | 5.11087 | 1.276<br>38  | 6.36 | 5.11087 | 0.992<br>2305 |
| 6.1 | 5.61052 | 1.409<br>46  | 6.22 | 5.61052 | 1.430<br>8   | 6.36 | 5.61052 | 1.127<br>74   |
| 6.1 | 6.15902 | 1.535<br>38  | 6.22 | 6.15902 | 1.593<br>05  | 6.36 | 6.15902 | 1.273<br>98   |
| 6.1 | 6.76114 | 1.663<br>2   | 6.22 | 6.76114 | 1.761<br>36  | 6.36 | 6.76114 | 1.430<br>015  |
| 6.1 | 7.42212 | 1.792<br>77  | 6.22 | 7.42212 | 1.934<br>57  | 6.36 | 7.42212 | 1.595<br>43   |
| 6.1 | 8.14773 | 1.925<br>01  | 6.22 | 8.14773 | 2.112<br>25  | 6.36 | 8.14773 | 1.770<br>465  |

|     |         |             |      |         |             |      |         |              |
|-----|---------|-------------|------|---------|-------------|------|---------|--------------|
| 6.1 | 8.94427 | 2.060<br>25 | 6.22 | 8.94427 | 2.293<br>63 | 6.36 | 8.94427 | 1.955<br>475 |
| 6.1 | 9.81869 | 2.196<br>12 | 6.22 | 9.81869 | 2.475<br>5  | 6.36 | 9.81869 | 2.148<br>99  |
| 6.1 | 10.7786 | 2.329<br>85 | 6.22 | 10.7786 | 2.653<br>41 | 6.36 | 10.7786 | 2.348        |
| 6.1 | 11.8323 | 2.460<br>85 | 6.22 | 11.8323 | 2.823<br>46 | 6.36 | 11.8323 | 2.548<br>57  |
| 6.1 | 12.9891 | 2.592<br>19 | 6.22 | 12.9891 | 2.984<br>7  | 6.36 | 12.9891 | 2.747<br>67  |
| 6.1 | 14.2589 | 2.724<br>72 | 6.22 | 14.2589 | 3.135<br>58 | 6.36 | 14.2589 | 2.941<br>565 |
| 6.1 | 15.6529 | 2.851<br>82 | 6.22 | 15.6529 | 3.269<br>77 | 6.36 | 15.6529 | 3.123<br>73  |
| 6.1 | 17.1832 | 2.959<br>68 | 6.22 | 17.1832 | 3.374<br>37 | 6.36 | 17.1832 | 3.283<br>825 |
| 6.1 | 18.863  | 3.036<br>29 | 6.22 | 18.863  | 3.434<br>83 | 6.36 | 18.863  | 3.410<br>805 |
| 6.1 | 20.7071 | 3.083<br>59 | 6.22 | 20.7071 | 3.445<br>54 | 6.36 | 20.7071 | 3.499<br>555 |
| 6.1 | 22.7315 | 3.118<br>65 | 6.22 | 22.7315 | 3.414<br>57 | 6.36 | 22.7315 | 3.554<br>01  |
| 6.1 | 24.9538 | 3.163<br>88 | 6.22 | 24.9538 | 3.361<br>55 | 6.36 | 24.9538 | 3.586<br>02  |
| 6.1 | 27.3934 | 3.228<br>97 | 6.22 | 27.3934 | 3.305<br>71 | 6.36 | 27.3934 | 3.607<br>54  |
| 6.1 | 30.0714 | 3.300<br>32 | 6.22 | 30.0714 | 3.254<br>83 | 6.36 | 30.0714 | 3.622<br>49  |
| 6.1 | 33.0113 | 3.345<br>52 | 6.22 | 33.0113 | 3.202<br>34 | 6.36 | 33.0113 | 3.624<br>295 |
| 6.1 | 36.2385 | 3.330<br>21 | 6.22 | 36.2385 | 3.131<br>25 | 6.36 | 36.2385 | 3.598<br>17  |
| 6.1 | 39.7813 | 3.239<br>95 | 6.22 | 39.7813 | 3.025<br>71 | 6.36 | 39.7813 | 3.529<br>22  |
| 6.1 | 43.6704 | 3.090<br>92 | 6.22 | 43.6704 | 2.88        | 6.36 | 43.6704 | 3.410<br>29  |
| 6.1 | 47.9397 | 2.920<br>5  | 6.22 | 47.9397 | 2.701<br>54 | 6.36 | 47.9397 | 3.245<br>51  |
| 6.1 | 52.6264 | 2.765<br>37 | 6.22 | 52.6264 | 2.509<br>4  | 6.36 | 52.6264 | 3.049<br>29  |
| 6.1 | 57.7713 | 2.642<br>37 | 6.22 | 57.7713 | 2.325<br>58 | 6.36 | 57.7713 | 2.840<br>755 |

|      |              |                    |      |              |                    |      |              |                    |
|------|--------------|--------------------|------|--------------|--------------------|------|--------------|--------------------|
| 6.1  | 63.4192      | 2.540<br>06        | 6.22 | 63.4192      | 2.168<br>81        | 6.36 | 63.4192      | 2.636<br>555       |
| 6.1  | 69.6192      | 2.430<br>04        | 6.22 | 69.6192      | 2.053<br>55        | 6.36 | 69.6192      | 2.447<br>9         |
| 6.1  | 76.4253      | 2.293<br>75        | 6.22 | 76.4253      | 1.983<br>25        | 6.36 | 76.4253      | 2.281<br>735       |
| 6.1  | 83.8969      | 2.130<br>57        | 6.22 | 83.8969      | 1.949<br>92        | 6.36 | 83.8969      | 2.136<br>035       |
| 6.1  | 92.0988      | 1.964<br>78        | 6.22 | 92.0988      | 1.926<br>49        | 6.36 | 92.0988      | 2.002<br>18        |
| 6.1  | 101.103      | 1.812<br>14        | 6.22 | 101.103      | 1.857<br>37        | 6.36 | 101.103      | 1.854<br>69        |
| 6.1  | 110.987      | 1.645<br>71        | 6.22 | 110.987      | 1.682<br>21        | 6.36 | 110.987      | 1.650<br>11        |
| 6.1  | 121.837      | 1.424<br>06        | 6.22 | 121.837      | 1.366<br>97        | 6.36 | 121.837      | 1.359<br>415       |
| 6.1  | 133.748      | 1.103<br>49        | 6.22 | 133.748      | 0.939<br>722       | 6.36 | 133.748      | 0.983<br>47        |
| 6.1  | 146.824      | 0.665<br>996       | 6.22 | 146.824      | 0.489<br>074       | 6.36 | 146.824      | 0.552<br>4795      |
| 6.1  | 161.177      | 0.278<br>316       | 6.22 | 161.177      | 0.169<br>47        | 6.36 | 161.177      | 0.214<br>748       |
| 6.1  | 176.935      | 0.056<br>9672      | 6.22 | 176.935      | 0.029<br>4958      | 6.36 | 176.935      | 0.041<br>5599      |
| 6.1  | 194.232      | 0.004<br>8942<br>8 | 6.22 | 194.232      | 0.001<br>9255<br>1 | 6.36 | 194.232      | 0.003<br>3201<br>5 |
| 6.1  | 213.221      | 0                  | 6.22 | 213.221      | 0                  | 6.36 | 213.221      | 0                  |
| 6.64 | 0.37519<br>8 | 0.030<br>0248      | 6.9  | 0.37519<br>8 | 0.029<br>9696      | 7.08 | 0.37519<br>8 | 0.027<br>2696      |
| 6.64 | 0.41187<br>8 | 0.053<br>5954      | 6.9  | 0.41187<br>8 | 0.053<br>4415<br>5 | 7.08 | 0.41187<br>8 | 0.048<br>6374<br>5 |
| 6.64 | 0.45214<br>5 | 0.078<br>9917      | 6.9  | 0.45214<br>5 | 0.078<br>6967<br>5 | 7.08 | 0.45214<br>5 | 0.071<br>6137      |
| 6.64 | 0.49634<br>7 | 0.112<br>096       | 6.9  | 0.49634<br>7 | 0.111<br>706       | 7.08 | 0.49634<br>7 | 0.101<br>5921<br>5 |
| 6.64 | 0.54487<br>2 | 0.138<br>514       | 6.9  | 0.54487<br>2 | 0.138<br>2445      | 7.08 | 0.54487<br>2 | 0.125<br>584       |
| 6.64 | 0.59814      | 0.161<br>194       | 6.9  | 0.59814      | 0.161<br>0605      | 7.08 | 0.59814      | 0.146<br>151       |

|      |              |               |     |              |               |      |              |               |
|------|--------------|---------------|-----|--------------|---------------|------|--------------|---------------|
| 6.64 | 0.65661<br>5 | 0.181<br>3165 | 6.9 | 0.65661<br>5 | 0.181<br>334  | 7.08 | 0.65661<br>5 | 0.164<br>3735 |
| 6.64 | 0.72080<br>7 | 0.200<br>375  | 6.9 | 0.72080<br>7 | 0.200<br>599  | 7.08 | 0.72080<br>7 | 0.181<br>6515 |
| 6.64 | 0.79127<br>5 | 0.215<br>131  | 6.9 | 0.79127<br>5 | 0.215<br>8575 | 7.08 | 0.79127<br>5 | 0.195<br>2065 |
| 6.64 | 0.86863<br>2 | 0.225<br>972  | 6.9 | 0.86863<br>2 | 0.227<br>2915 | 7.08 | 0.86863<br>2 | 0.205<br>2775 |
| 6.64 | 0.95355<br>2 | 0.234<br>2075 | 6.9 | 0.95355<br>2 | 0.236<br>113  | 7.08 | 0.95355<br>2 | 0.213<br>0145 |
| 6.64 | 1.04677      | 0.241<br>2095 | 6.9 | 1.04677      | 0.243<br>6325 | 7.08 | 1.04677      | 0.219<br>66   |
| 6.64 | 1.14911      | 0.248<br>042  | 6.9 | 1.14911      | 0.251<br>0295 | 7.08 | 1.14911      | 0.226<br>2755 |
| 6.64 | 1.26145      | 0.254<br>707  | 6.9 | 1.26145      | 0.258<br>1705 | 7.08 | 1.26145      | 0.232<br>758  |
| 6.64 | 1.38477      | 0.263<br>2015 | 6.9 | 1.38477      | 0.266<br>795  | 7.08 | 1.38477      | 0.240<br>7065 |
| 6.64 | 1.52015      | 0.275<br>091  | 6.9 | 1.52015      | 0.278<br>2035 | 7.08 | 1.52015      | 0.251<br>3125 |
| 6.64 | 1.66876      | 0.293<br>024  | 6.9 | 1.66876      | 0.294<br>8495 | 7.08 | 1.66876      | 0.266<br>787  |
| 6.64 | 1.8319       | 0.317<br>269  | 6.9 | 1.8319       | 0.316<br>891  | 7.08 | 1.8319       | 0.287<br>1775 |
| 6.64 | 2.011        | 0.349<br>3845 | 6.9 | 2.011        | 0.345<br>523  | 7.08 | 2.011        | 0.313<br>466  |
| 6.64 | 2.2076       | 0.390<br>7075 | 6.9 | 2.2076       | 0.381<br>607  | 7.08 | 2.2076       | 0.346<br>308  |
| 6.64 | 2.42342      | 0.443<br>3885 | 6.9 | 2.42342      | 0.426<br>694  | 7.08 | 2.42342      | 0.386<br>99   |
| 6.64 | 2.66033      | 0.507<br>954  | 6.9 | 2.66033      | 0.481<br>0525 | 7.08 | 2.66033      | 0.435<br>563  |
| 6.64 | 2.92042      | 0.584<br>7955 | 6.9 | 2.92042      | 0.544<br>7625 | 7.08 | 2.92042      | 0.491<br>8615 |
| 6.64 | 3.20592      | 0.674<br>3985 | 6.9 | 3.20592      | 0.617<br>907  | 7.08 | 3.20592      | 0.555<br>7335 |
| 6.64 | 3.51934      | 0.777<br>142  | 6.9 | 3.51934      | 0.700<br>26   | 7.08 | 3.51934      | 0.626<br>7765 |
| 6.64 | 3.8634       | 0.892<br>937  | 6.9 | 3.8634       | 0.791<br>4885 | 7.08 | 3.8634       | 0.704<br>546  |
| 6.64 | 4.2411       | 1.020<br>64   | 6.9 | 4.2411       | 0.890<br>484  | 7.08 | 4.2411       | 0.787<br>9425 |

|      |         |              |     |         |              |      |         |               |
|------|---------|--------------|-----|---------|--------------|------|---------|---------------|
| 6.64 | 4.65572 | 1.159<br>359 | 6.9 | 4.65572 | 0.996<br>581 | 7.08 | 4.65572 | 0.876<br>2895 |
| 6.64 | 5.11087 | 1.308<br>11  | 6.9 | 5.11087 | 1.108<br>87  | 7.08 | 5.11087 | 0.968<br>7395 |
| 6.64 | 5.61052 | 1.466<br>295 | 6.9 | 5.61052 | 1.226<br>86  | 7.08 | 5.61052 | 1.064<br>95   |
| 6.64 | 6.15902 | 1.632<br>45  | 6.9 | 6.15902 | 1.349<br>575 | 7.08 | 6.15902 | 1.164<br>285  |
| 6.64 | 6.76114 | 1.804<br>795 | 6.9 | 6.76114 | 1.476<br>1   | 7.08 | 6.76114 | 1.266<br>25   |
| 6.64 | 7.42212 | 1.982<br>115 | 6.9 | 7.42212 | 1.606<br>14  | 7.08 | 7.42212 | 1.370<br>96   |
| 6.64 | 8.14773 | 2.163<br>99  | 6.9 | 8.14773 | 1.739<br>68  | 7.08 | 8.14773 | 1.478<br>77   |
| 6.64 | 8.94427 | 2.349<br>725 | 6.9 | 8.94427 | 1.876<br>475 | 7.08 | 8.94427 | 1.590<br>26   |
| 6.64 | 9.81869 | 2.536<br>085 | 6.9 | 9.81869 | 2.014<br>43  | 7.08 | 9.81869 | 1.704<br>75   |
| 6.64 | 10.7786 | 2.718<br>34  | 6.9 | 10.7786 | 2.151<br>22  | 7.08 | 10.7786 | 1.821<br>93   |
| 6.64 | 11.8323 | 2.891<br>87  | 6.9 | 11.8323 | 2.284<br>76  | 7.08 | 11.8323 | 1.941<br>58   |
| 6.64 | 12.9891 | 3.054<br>36  | 6.9 | 12.9891 | 2.414<br>765 | 7.08 | 12.9891 | 2.064<br>885  |
| 6.64 | 14.2589 | 3.202<br>565 | 6.9 | 14.2589 | 2.539<br>65  | 7.08 | 14.2589 | 2.191<br>62   |
| 6.64 | 15.6529 | 3.328<br>505 | 6.9 | 15.6529 | 2.654<br>58  | 7.08 | 15.6529 | 2.319<br>03   |
| 6.64 | 17.1832 | 3.418<br>26  | 6.9 | 17.1832 | 2.751<br>805 | 7.08 | 17.1832 | 2.442<br>195  |
| 6.64 | 18.863  | 3.457<br>56  | 6.9 | 18.863  | 2.824<br>775 | 7.08 | 18.863  | 2.556<br>82   |
| 6.64 | 20.7071 | 3.441<br>92  | 6.9 | 20.7071 | 2.875<br>06  | 7.08 | 20.7071 | 2.664<br>33   |
| 6.64 | 22.7315 | 3.381<br>08  | 6.9 | 22.7315 | 2.912<br>44  | 7.08 | 22.7315 | 2.770<br>63   |
| 6.64 | 24.9538 | 3.295<br>93  | 6.9 | 24.9538 | 2.951<br>255 | 7.08 | 24.9538 | 2.883<br>575  |
| 6.64 | 27.3934 | 3.205<br>96  | 6.9 | 27.3934 | 3.000<br>685 | 7.08 | 27.3934 | 3.005<br>395  |
| 6.64 | 30.0714 | 3.118<br>66  | 6.9 | 30.0714 | 3.058<br>34  | 7.08 | 30.0714 | 3.128<br>885  |

|      |         |                    |     |         |                    |      |         |                    |
|------|---------|--------------------|-----|---------|--------------------|------|---------|--------------------|
| 6.64 | 33.0113 | 3.027<br>495       | 6.9 | 33.0113 | 3.110<br>885       | 7.08 | 33.0113 | 3.239<br>02        |
| 6.64 | 36.2385 | 2.917<br>44        | 6.9 | 36.2385 | 3.139<br>97        | 7.08 | 36.2385 | 3.318<br>29        |
| 6.64 | 39.7813 | 2.778<br>5         | 6.9 | 39.7813 | 3.131<br>83        | 7.08 | 39.7813 | 3.354              |
| 6.64 | 43.6704 | 2.614<br>51        | 6.9 | 43.6704 | 3.082<br>655       | 7.08 | 43.6704 | 3.341<br>165       |
| 6.64 | 47.9397 | 2.444<br>5         | 6.9 | 47.9397 | 2.998<br>775       | 7.08 | 47.9397 | 3.282<br>515       |
| 6.64 | 52.6264 | 2.296<br>13        | 6.9 | 52.6264 | 2.891<br>57        | 7.08 | 52.6264 | 3.185<br>135       |
| 6.64 | 57.7713 | 2.191<br>765       | 6.9 | 57.7713 | 2.773<br>42        | 7.08 | 57.7713 | 3.060<br>36        |
| 6.64 | 63.4192 | 2.142<br>16        | 6.9 | 63.4192 | 2.654<br>88        | 7.08 | 63.4192 | 2.923<br>605       |
| 6.64 | 69.6192 | 2.145<br>075       | 6.9 | 69.6192 | 2.545<br>19        | 7.08 | 69.6192 | 2.794<br>18        |
| 6.64 | 76.4253 | 2.182<br>54        | 6.9 | 76.4253 | 2.461<br>02        | 7.08 | 76.4253 | 2.701<br>94        |
| 6.64 | 83.8969 | 2.225<br>445       | 6.9 | 83.8969 | 2.419<br>385       | 7.08 | 83.8969 | 2.675<br>905       |
| 6.64 | 92.0988 | 2.225<br>705       | 6.9 | 92.0988 | 2.430<br>365       | 7.08 | 92.0988 | 2.731<br>63        |
| 6.64 | 101.103 | 2.116<br>22        | 6.9 | 101.103 | 2.476<br>145       | 7.08 | 101.103 | 2.846<br>83        |
| 6.64 | 110.987 | 1.847<br>07        | 6.9 | 110.987 | 2.483<br>285       | 7.08 | 110.987 | 2.926<br>605       |
| 6.64 | 121.837 | 1.409<br>975       | 6.9 | 121.837 | 2.349<br>325       | 7.08 | 121.837 | 2.833<br>81        |
| 6.64 | 133.748 | 0.860<br>5055      | 6.9 | 133.748 | 1.993<br>03        | 7.08 | 133.748 | 2.455<br>275       |
| 6.64 | 146.824 | 0.378<br>5035      | 6.9 | 146.824 | 1.426<br>05        | 7.08 | 146.824 | 1.790<br>13        |
| 6.64 | 161.177 | 0.099<br>5265<br>5 | 6.9 | 161.177 | 0.767<br>986       | 7.08 | 161.177 | 0.981<br>4885      |
| 6.64 | 176.935 | 0.013<br>1777<br>9 | 6.9 | 176.935 | 0.274<br>339       | 7.08 | 176.935 | 0.357<br>9525      |
| 6.64 | 194.232 | 0.000<br>5250<br>5 | 6.9 | 194.232 | 0.048<br>8979<br>5 | 7.08 | 194.232 | 0.065<br>1913<br>5 |



|      |              |                    |      |              |                    |      |              |                    |
|------|--------------|--------------------|------|--------------|--------------------|------|--------------|--------------------|
|      |              |                    |      |              | 0.003<br>2894      |      |              | 0.004<br>5995      |
| 6.64 | 213.221      | 0                  | 6.9  | 213.221      | 3                  | 7.08 | 213.221      | 3                  |
|      |              |                    | 6.9  | 234.066      | 0                  | 7.08 | 234.066      | 0                  |
| 7.13 | 0.37519<br>8 | 0.028<br>2141      | 7.23 | 0.37519<br>8 | 0.031<br>8282      | 7.37 | 0.37519<br>8 | 0.029<br>0608<br>5 |
| 7.13 | 0.41187<br>8 | 0.050<br>3091<br>5 | 7.23 | 0.41187<br>8 | 0.056<br>7413<br>5 | 7.37 | 0.41187<br>8 | 0.051<br>8361      |
| 7.13 | 0.45214<br>5 | 0.074<br>0722      | 7.23 | 0.45214<br>5 | 0.083<br>5014<br>5 | 7.37 | 0.45214<br>5 | 0.076<br>3628<br>5 |
| 7.13 | 0.49634<br>7 | 0.105<br>094       | 7.23 | 0.49634<br>7 | 0.118<br>42        | 7.37 | 0.49634<br>7 | 0.108<br>4055      |
| 7.13 | 0.54487<br>2 | 0.129<br>9315      | 7.23 | 0.54487<br>2 | 0.146<br>4105      | 7.37 | 0.54487<br>2 | 0.134<br>149       |
| 7.13 | 0.59814      | 0.151<br>207       | 7.23 | 0.59814      | 0.170<br>406       | 7.37 | 0.59814      | 0.156<br>3475      |
| 7.13 | 0.65661<br>5 | 0.170<br>043       | 7.23 | 0.65661<br>5 | 0.191<br>712       | 7.37 | 0.65661<br>5 | 0.176<br>1785      |
| 7.13 | 0.72080<br>7 | 0.187<br>9115      | 7.23 | 0.72080<br>7 | 0.211<br>983       | 7.37 | 0.72080<br>7 | 0.195<br>141       |
| 7.13 | 0.79127<br>5 | 0.201<br>937       | 7.23 | 0.79127<br>5 | 0.228<br>0945      | 7.37 | 0.79127<br>5 | 0.210<br>263       |
| 7.13 | 0.86863<br>2 | 0.212<br>321       | 7.23 | 0.86863<br>2 | 0.240<br>32        | 7.37 | 0.86863<br>2 | 0.221<br>842       |
| 7.13 | 0.95355<br>2 | 0.220<br>245       | 7.23 | 0.95355<br>2 | 0.250<br>098       | 7.37 | 0.95355<br>2 | 0.231<br>142       |
| 7.13 | 1.04677      | 0.227<br>0295      | 7.23 | 1.04677      | 0.258<br>9615      | 7.37 | 1.04677      | 0.239<br>501       |
| 7.13 | 1.14911      | 0.233<br>801       | 7.23 | 1.14911      | 0.268<br>2275      | 7.37 | 1.14911      | 0.247<br>9935      |
| 7.13 | 1.26145      | 0.240<br>4285      | 7.23 | 1.26145      | 0.277<br>799       | 7.37 | 1.26145      | 0.256<br>508       |
| 7.13 | 1.38477      | 0.248<br>554       | 7.23 | 1.38477      | 0.289<br>5715      | 7.37 | 1.38477      | 0.266<br>7725      |
| 7.13 | 1.52015      | 0.259<br>4565      | 7.23 | 1.52015      | 0.304<br>975       | 7.37 | 1.52015      | 0.280<br>0955      |
| 7.13 | 1.66876      | 0.275<br>5025      | 7.23 | 1.66876      | 0.326<br>5465      | 7.37 | 1.66876      | 0.298<br>8055      |
| 7.13 | 1.8319       | 0.296<br>7995      | 7.23 | 1.8319       | 0.354<br>2915      | 7.37 | 1.8319       | 0.322<br>911       |

|      |         |               |      |         |               |      |         |               |
|------|---------|---------------|------|---------|---------------|------|---------|---------------|
| 7.13 | 2.011   | 0.324<br>3725 | 7.23 | 2.011   | 0.389<br>253  | 7.37 | 2.011   | 0.353<br>467  |
| 7.13 | 2.2076  | 0.358<br>934  | 7.23 | 2.2076  | 0.432<br>1135 | 7.37 | 2.2076  | 0.391<br>238  |
| 7.13 | 2.42342 | 0.401<br>924  | 7.23 | 2.42342 | 0.484<br>178  | 7.37 | 2.42342 | 0.437<br>645  |
| 7.13 | 2.66033 | 0.453<br>529  | 7.23 | 2.66033 | 0.545<br>208  | 7.37 | 2.66033 | 0.492<br>6495 |
| 7.13 | 2.92042 | 0.513<br>637  | 7.23 | 2.92042 | 0.614<br>6295 | 7.37 | 2.92042 | 0.555<br>9965 |
| 7.13 | 3.20592 | 0.582<br>039  | 7.23 | 3.20592 | 0.691<br>908  | 7.37 | 3.20592 | 0.627<br>4755 |
| 7.13 | 3.51934 | 0.658<br>2905 | 7.23 | 3.51934 | 0.776<br>2705 | 7.37 | 3.51934 | 0.706<br>7305 |
| 7.13 | 3.8634  | 0.741<br>969  | 7.23 | 3.8634  | 0.866<br>7785 | 7.37 | 3.8634  | 0.793<br>221  |
| 7.13 | 4.2411  | 0.831<br>93   | 7.23 | 4.2411  | 0.961<br>543  | 7.37 | 4.2411  | 0.885<br>5645 |
| 7.13 | 4.65572 | 0.927<br>267  | 7.23 | 4.65572 | 1.059<br>16   | 7.37 | 4.65572 | 0.982<br>799  |
| 7.13 | 5.11087 | 1.026<br>73   | 7.23 | 5.11087 | 1.158<br>29   | 7.37 | 5.11087 | 1.083<br>975  |
| 7.13 | 5.61052 | 1.129<br>655  | 7.23 | 5.61052 | 1.258<br>385  | 7.37 | 5.61052 | 1.188<br>8    |
| 7.13 | 6.15902 | 1.235<br>15   | 7.23 | 6.15902 | 1.358<br>315  | 7.37 | 6.15902 | 1.296<br>47   |
| 7.13 | 6.76114 | 1.342<br>445  | 7.23 | 6.76114 | 1.456<br>87   | 7.37 | 6.76114 | 1.406<br>14   |
| 7.13 | 7.42212 | 1.450<br>98   | 7.23 | 7.42212 | 1.553<br>44   | 7.37 | 7.42212 | 1.517<br>585  |
| 7.13 | 8.14773 | 1.560<br>15   | 7.23 | 8.14773 | 1.648<br>075  | 7.37 | 8.14773 | 1.631<br>285  |
| 7.13 | 8.94427 | 1.669<br>56   | 7.23 | 8.94427 | 1.741<br>095  | 7.37 | 8.94427 | 1.747<br>995  |
| 7.13 | 9.81869 | 1.777<br>835  | 7.23 | 9.81869 | 1.831<br>3    | 7.37 | 9.81869 | 1.866<br>96   |
| 7.13 | 10.7786 | 1.884<br>195  | 7.23 | 10.7786 | 1.918<br>11   | 7.37 | 10.7786 | 1.987<br>325  |
| 7.13 | 11.8323 | 1.988<br>11   | 7.23 | 11.8323 | 2.002<br>99   | 7.37 | 11.8323 | 2.108<br>82   |
| 7.13 | 12.9891 | 2.091<br>235  | 7.23 | 12.9891 | 2.092<br>21   | 7.37 | 12.9891 | 2.233<br>685  |

|      |         |              |      |         |              |      |         |              |
|------|---------|--------------|------|---------|--------------|------|---------|--------------|
| 7.13 | 14.2589 | 2.195<br>63  | 7.23 | 14.2589 | 2.192<br>485 | 7.37 | 14.2589 | 2.363<br>3   |
| 7.13 | 15.6529 | 2.303<br>165 | 7.23 | 15.6529 | 2.305<br>895 | 7.37 | 15.6529 | 2.494<br>815 |
| 7.13 | 17.1832 | 2.414<br>685 | 7.23 | 17.1832 | 2.426<br>125 | 7.37 | 17.1832 | 2.619<br>895 |
| 7.13 | 18.863  | 2.529<br>99  | 7.23 | 18.863  | 2.540<br>785 | 7.37 | 18.863  | 2.728<br>665 |
| 7.13 | 20.7071 | 2.650<br>145 | 7.23 | 20.7071 | 2.640<br>915 | 7.37 | 20.7071 | 2.818<br>265 |
| 7.13 | 22.7315 | 2.775<br>84  | 7.23 | 22.7315 | 2.726<br>3   | 7.37 | 22.7315 | 2.895<br>66  |
| 7.13 | 24.9538 | 2.907<br>205 | 7.23 | 24.9538 | 2.806<br>76  | 7.37 | 24.9538 | 2.975<br>41  |
| 7.13 | 27.3934 | 3.039<br>975 | 7.23 | 27.3934 | 2.892<br>52  | 7.37 | 27.3934 | 3.069        |
| 7.13 | 30.0714 | 3.164<br>28  | 7.23 | 30.0714 | 2.984<br>875 | 7.37 | 30.0714 | 3.175<br>705 |
| 7.13 | 33.0113 | 3.266<br>48  | 7.23 | 33.0113 | 3.072<br>48  | 7.37 | 33.0113 | 3.280<br>7   |
| 7.13 | 36.2385 | 3.332<br>17  | 7.23 | 36.2385 | 3.135<br>135 | 7.37 | 36.2385 | 3.359<br>98  |
| 7.13 | 39.7813 | 3.351<br>215 | 7.23 | 39.7813 | 3.154<br>835 | 7.37 | 39.7813 | 3.391<br>505 |
| 7.13 | 43.6704 | 3.319<br>135 | 7.23 | 43.6704 | 3.123<br>485 | 7.37 | 43.6704 | 3.364<br>005 |
| 7.13 | 47.9397 | 3.238<br>215 | 7.23 | 47.9397 | 3.046<br>385 | 7.37 | 47.9397 | 3.280<br>34  |
| 7.13 | 52.6264 | 3.116<br>4   | 7.23 | 52.6264 | 2.937<br>205 | 7.37 | 52.6264 | 3.153<br>705 |
| 7.13 | 57.7713 | 2.967<br>32  | 7.23 | 57.7713 | 2.810<br>925 | 7.37 | 57.7713 | 3.002<br>855 |
| 7.13 | 63.4192 | 2.810<br>335 | 7.23 | 63.4192 | 2.681<br>37  | 7.37 | 63.4192 | 2.845<br>69  |
| 7.13 | 69.6192 | 2.667<br>16  | 7.23 | 69.6192 | 2.558<br>555 | 7.37 | 69.6192 | 2.697<br>135 |
| 7.13 | 76.4253 | 2.566<br>255 | 7.23 | 76.4253 | 2.459<br>26  | 7.37 | 76.4253 | 2.576<br>345 |
| 7.13 | 83.8969 | 2.535<br>235 | 7.23 | 83.8969 | 2.411<br>965 | 7.37 | 83.8969 | 2.497<br>69  |
| 7.13 | 92.0988 | 2.587<br>905 | 7.23 | 92.0988 | 2.440<br>705 | 7.37 | 92.0988 | 2.467<br>98  |

|      |         |               |      |         |                    |      |         |                    |
|------|---------|---------------|------|---------|--------------------|------|---------|--------------------|
| 7.13 | 101.103 | 2.706<br>4    | 7.23 | 101.103 | 2.550<br>685       | 7.37 | 101.103 | 2.465<br>73        |
| 7.13 | 110.987 | 2.805<br>645  | 7.23 | 110.987 | 2.679<br>87        | 7.37 | 110.987 | 2.417<br>175       |
| 7.13 | 121.837 | 2.751<br>575  | 7.23 | 121.837 | 2.696<br>765       | 7.37 | 121.837 | 2.231<br>845       |
| 7.13 | 133.748 | 2.426<br>705  | 7.23 | 133.748 | 2.464<br>09        | 7.37 | 133.748 | 1.843<br>04        |
| 7.13 | 146.824 | 1.815<br>895  | 7.23 | 146.824 | 1.924<br>835       | 7.37 | 146.824 | 1.270<br>385       |
| 7.13 | 161.177 | 1.025<br>263  | 7.23 | 161.177 | 1.135<br>965       | 7.37 | 161.177 | 0.655<br>073       |
| 7.13 | 176.935 | 0.388<br>605  | 7.23 | 176.935 | 0.453<br>034       | 7.37 | 176.935 | 0.219<br>6405      |
| 7.13 | 194.232 | 0.072<br>9732 | 7.23 | 194.232 | 0.088<br>7384<br>5 | 7.37 | 194.232 | 0.037<br>0559<br>5 |
| 7.13 | 213.221 | 0.005<br>4034 | 7.23 | 213.221 | 0.007<br>0411<br>6 | 7.37 | 213.221 | 0.002<br>2552      |
| 7.13 | 234.066 | 0             | 7.23 | 234.066 | 0                  | 7.37 | 234.066 | 0                  |

## References

Coles, Stuart, et al. An introduction to statistical modeling of extreme values. Vol. 208. London: Springer, 2001.

Dade, W. Brian, and Peter F. Friend. Grain-size, sediment-transport regime, and channel slope in alluvial rivers. *The journal of Geology* 106.6: 661-676, 1998.

Singer, A.. The paleoclimatic interpretation of clay minerals in sediments -- a review. *Earth-Sci. Rev.*, 21: 251-293,1984.

Sachse, D., Billault, I., Bowen, G. J., Chikaraishi, Y., Dawson, T. E., Feakins, S. J., Freeman, K. H., Magill, C. R., McInerney, F. A., van der Meer, M. T. J., Polissar, P., Robins, R. J., Sachs, J. P., Schmidt, H.-L., Sessions, A. L., White, J. W. C., West, J. B., and Kahmen, A.: Molecular Paleohydrology: Interpreting the Hydrogen-Isotopic Composition of Lipid Biomarkers from Photosynthesizing Organisms, *Annu Rev Earth Planet Sci*, 40, 221–249, <https://doi.org/10.1146/annurev-earth-042711-105535>, 2012

Tipple, B. J., Pagani, M., Krishnan, S., Dirghangi, S. S., Galeotti, S., Agnini, C., Giusberti, L., and Rio, D.: Coupled high-resolution marine and terrestrial records of carbon and hydrologic cycles variations during the Paleocene – Eocene Thermal Maximum ( PETM ), *Earth Planet Sci Lett*, 311, 82–92, <https://doi.org/10.1016/j.epsl.2011.08.045>, 2011

Van Rijn, L. C. Unified view of sediment transport by currents and waves. I: Initiation of motion, bed roughness, and bed-load transport. *Journal of Hydraulic engineering*, 133(6), 649-667, 2007.
